# Supplementary material for: Postnatal Expression Profile of MicroRNAs Associated with Cardiovascular Diseases in 3- to 11-Year-Old Preterm-Born Children
Source: MDPI journal article supplement (doi:10.3390/biomedicines9070727), 2021-06-24
Supplement: s1 [file s1]

Supplementary Figure S5.

**A**

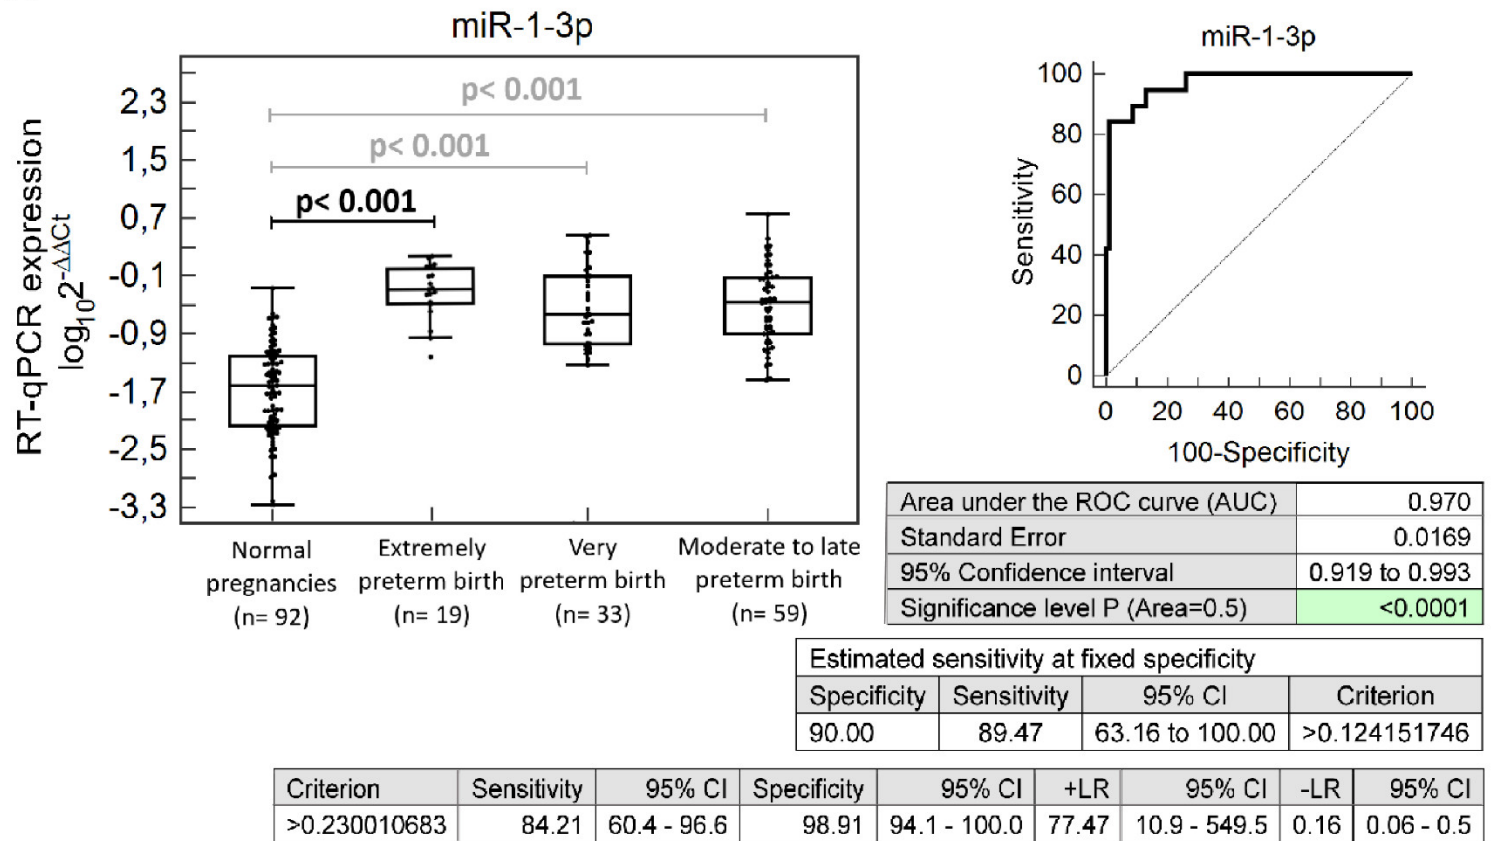

**B**

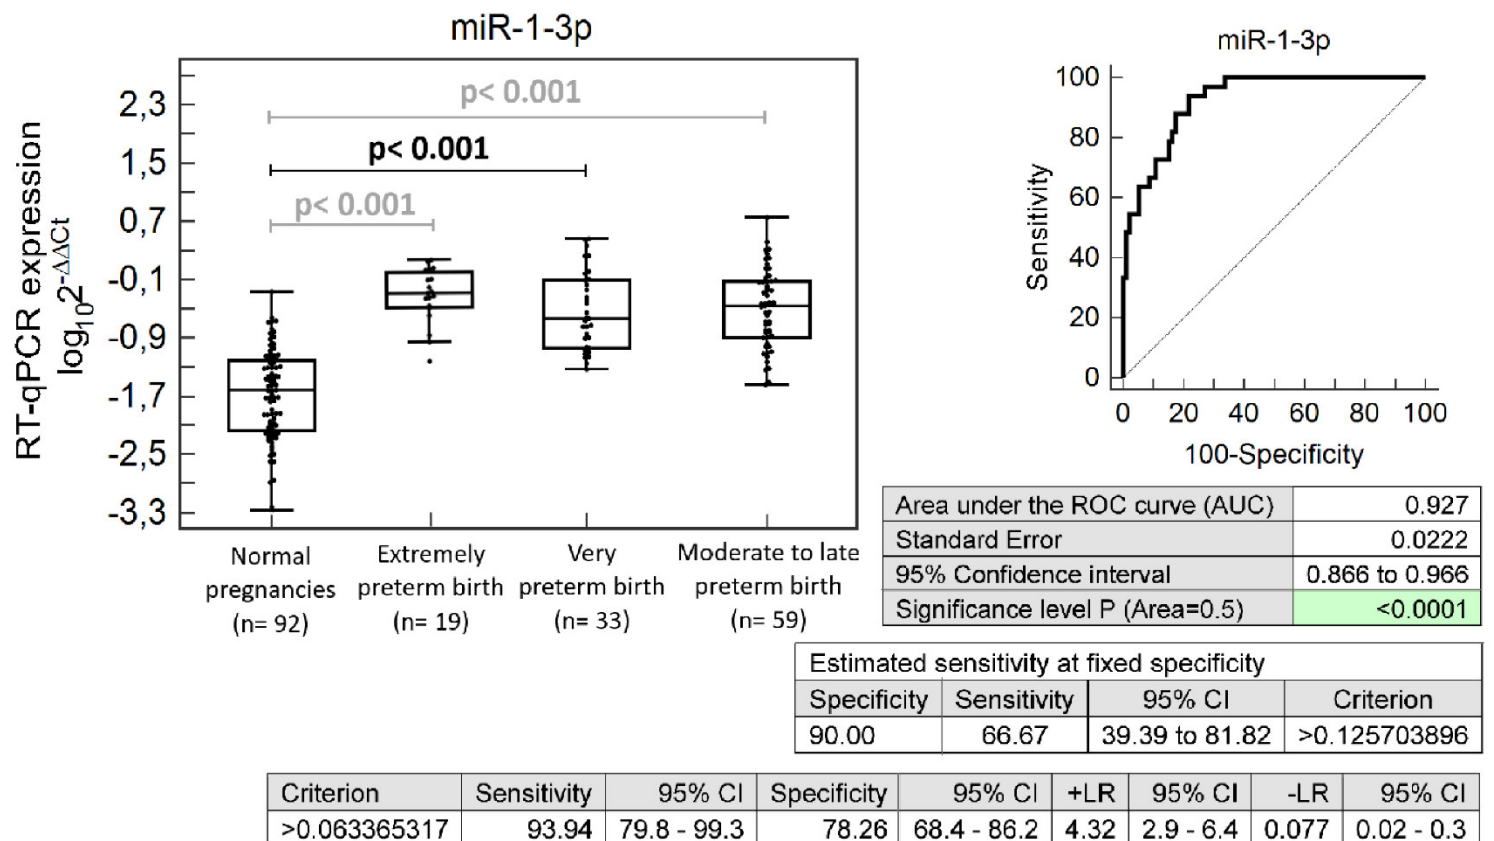

C

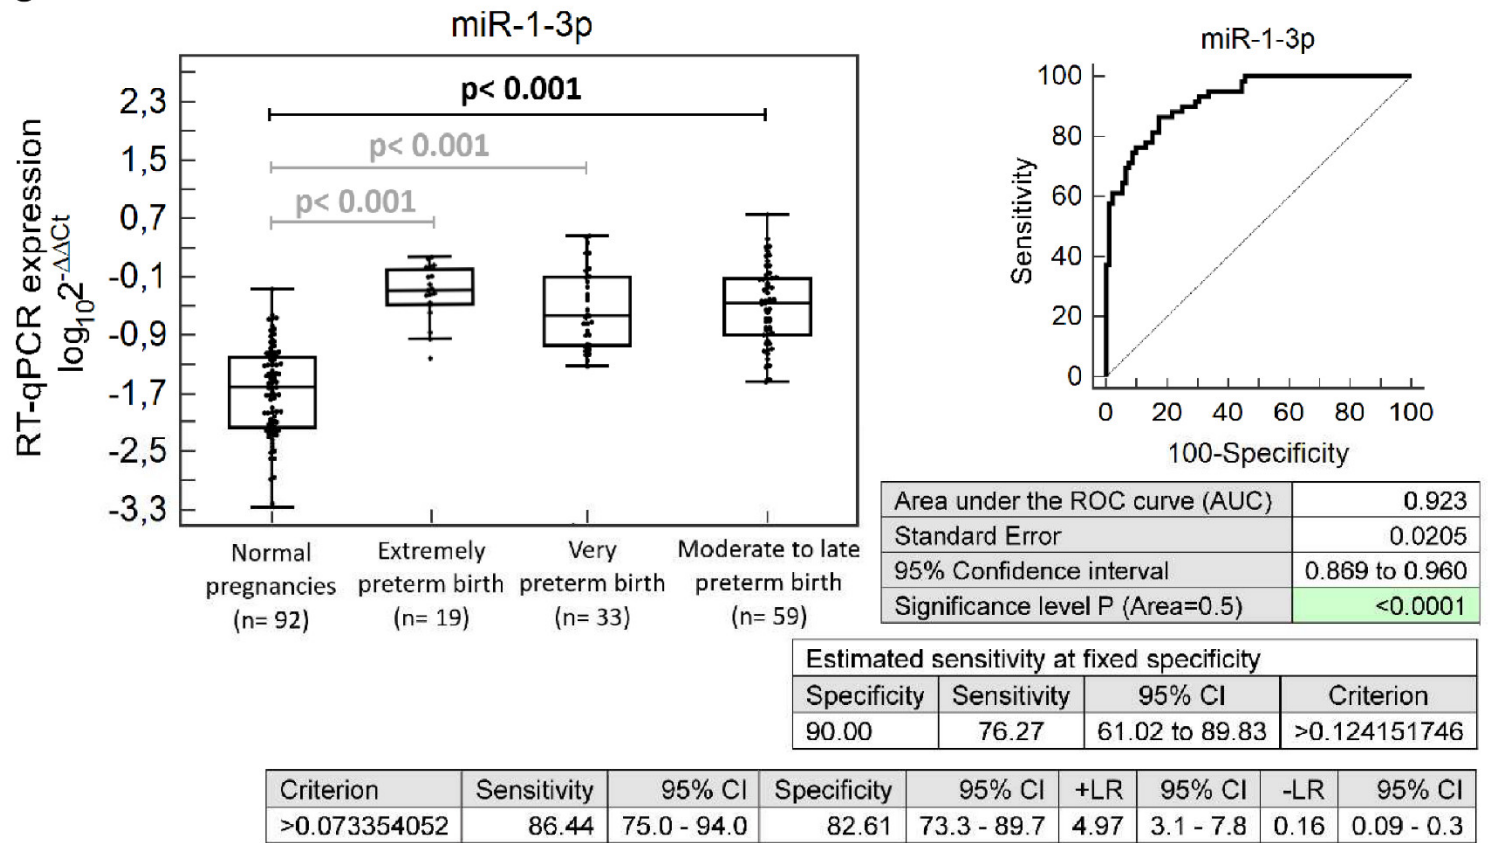

D

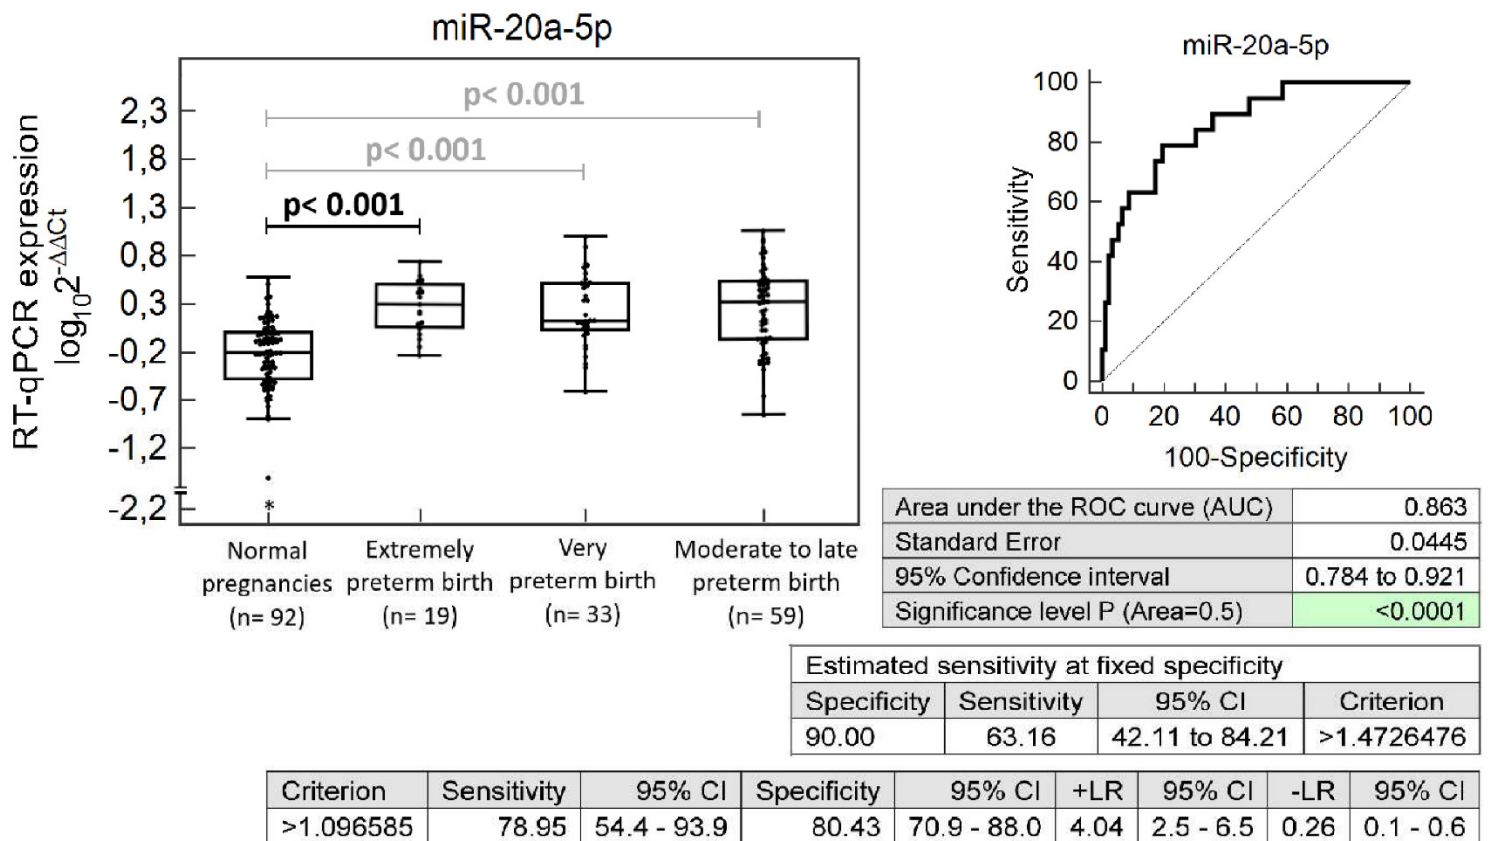

**E**

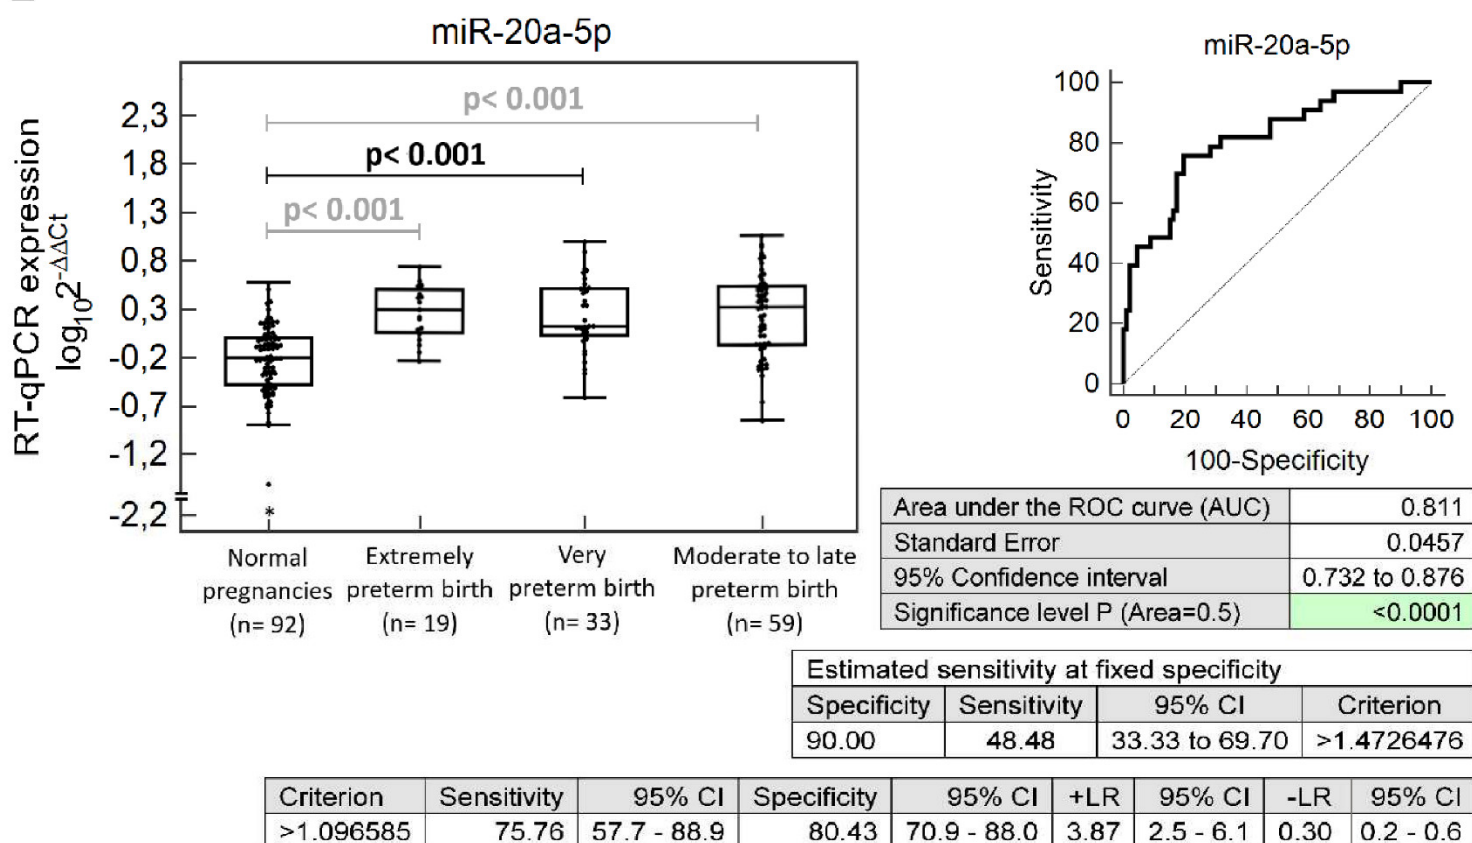

**F**

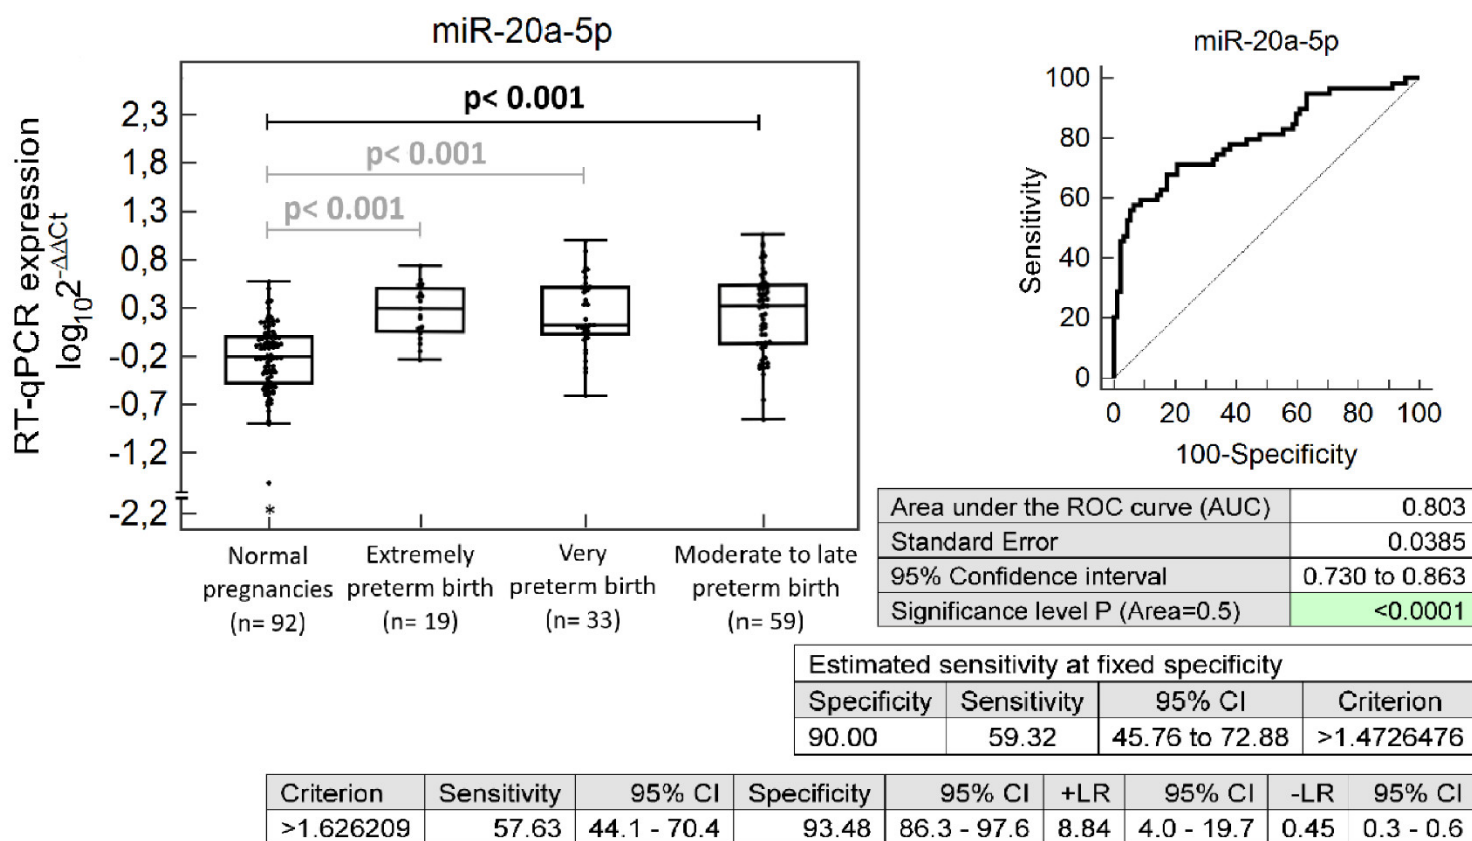

**Supplementary Figure S5.** Altered Postnatal MicroRNA Expression Profile in Preterm Born Children with regard to Gestational Age at Delivery (extremely preterm, very preterm, and moderate to late preterm). Box plots and ROC curves of 2 selected individual microRNAs (miR-1-3p and miR-20a-5p) with the best sensitivity at 10.0% FPR are presented.
