# Supplementary material for: Postnatal Expression Profile of MicroRNAs Associated with Cardiovascular Diseases in 3- to 11-Year-Old Preterm-Born Children
Source: MDPI journal article supplement (doi:10.3390/biomedicines9070727), 2021-06-24
Supplement: s1 [file s1]

Supplementary Figure S2.

**A**

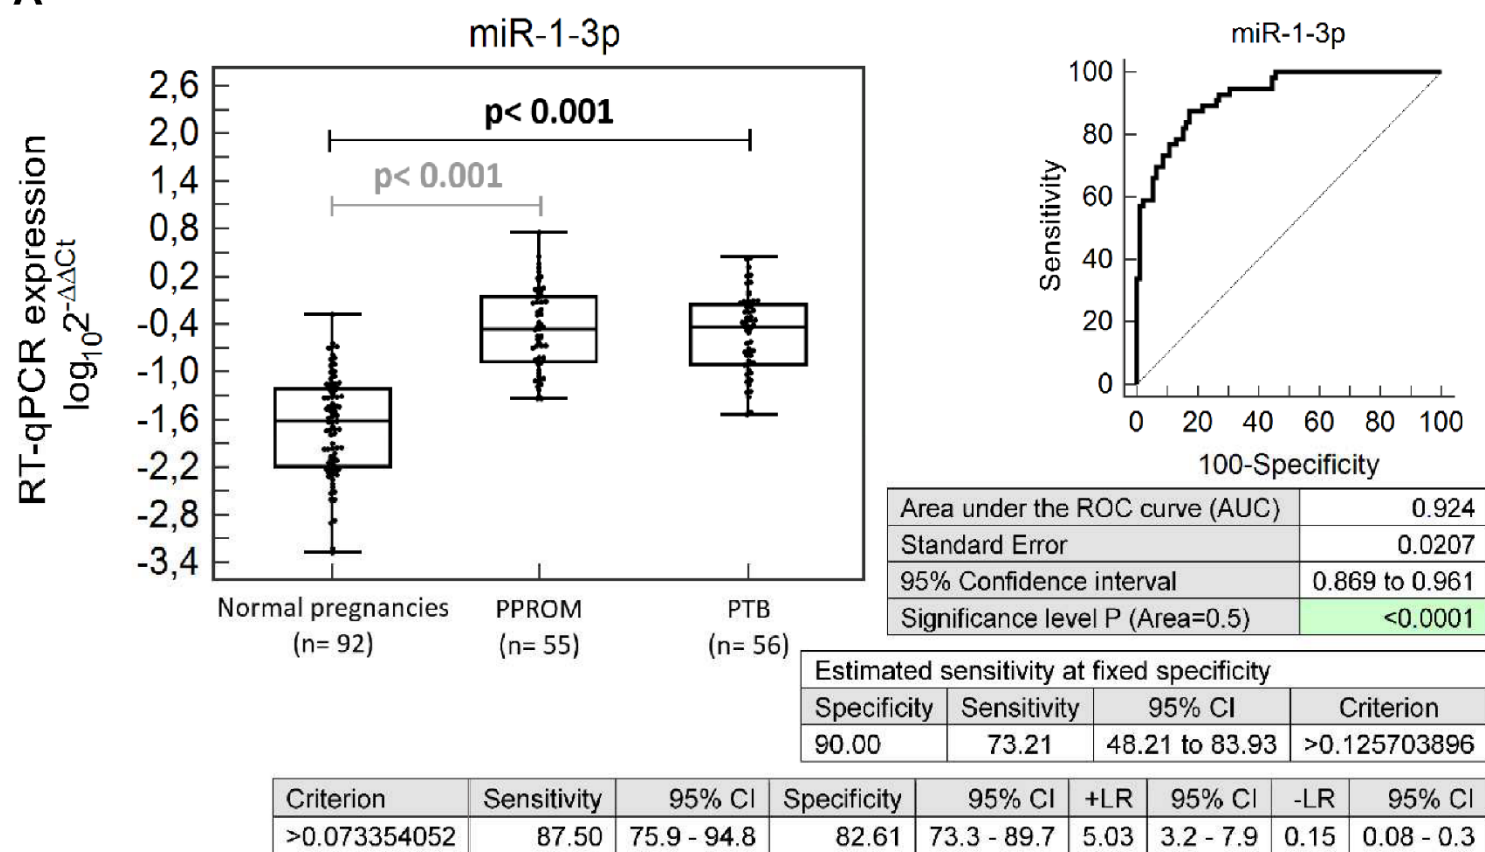

**B**

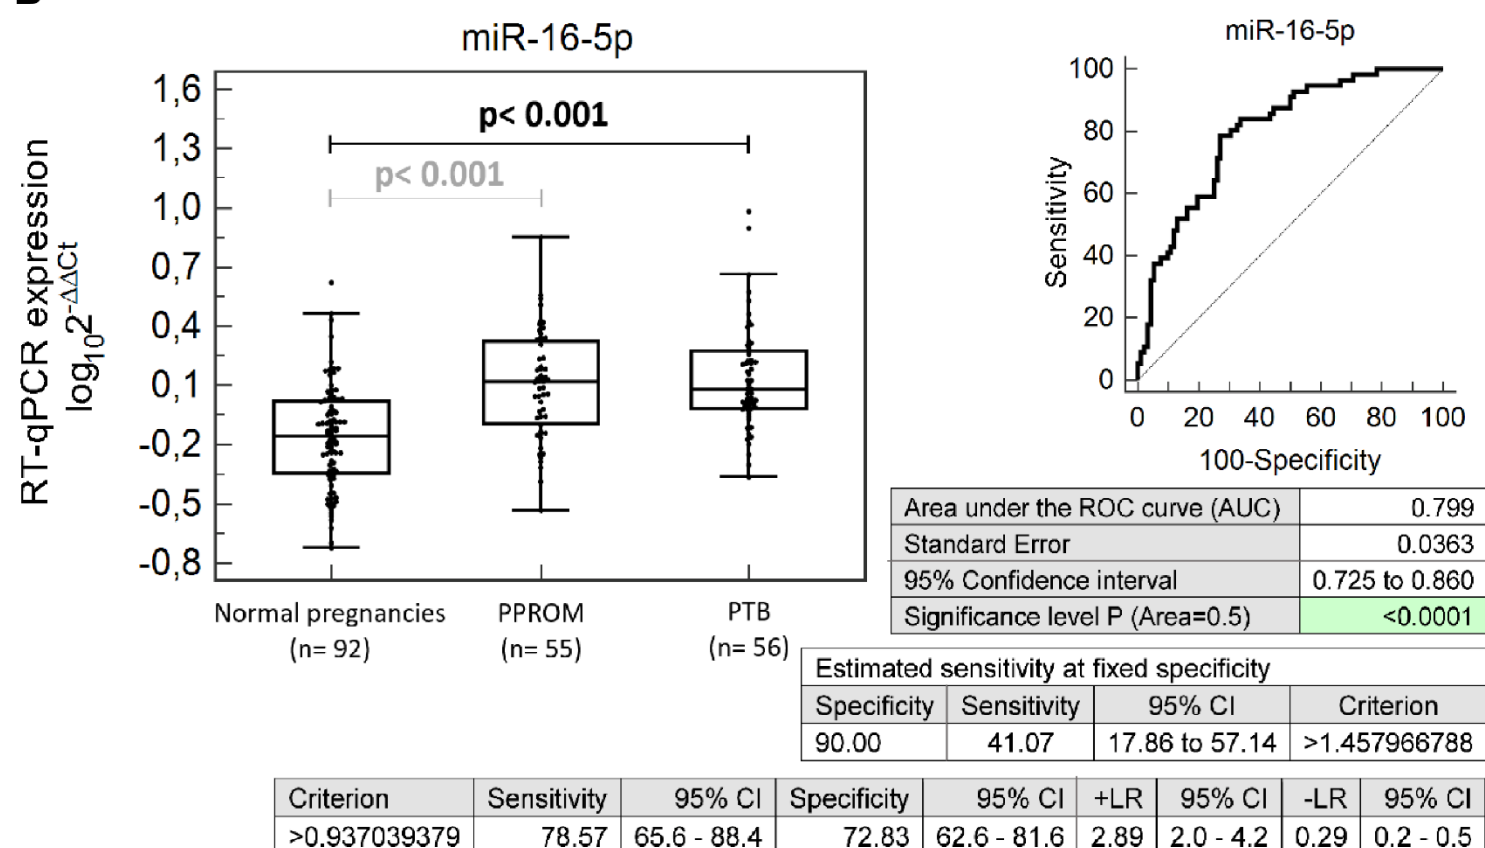

C

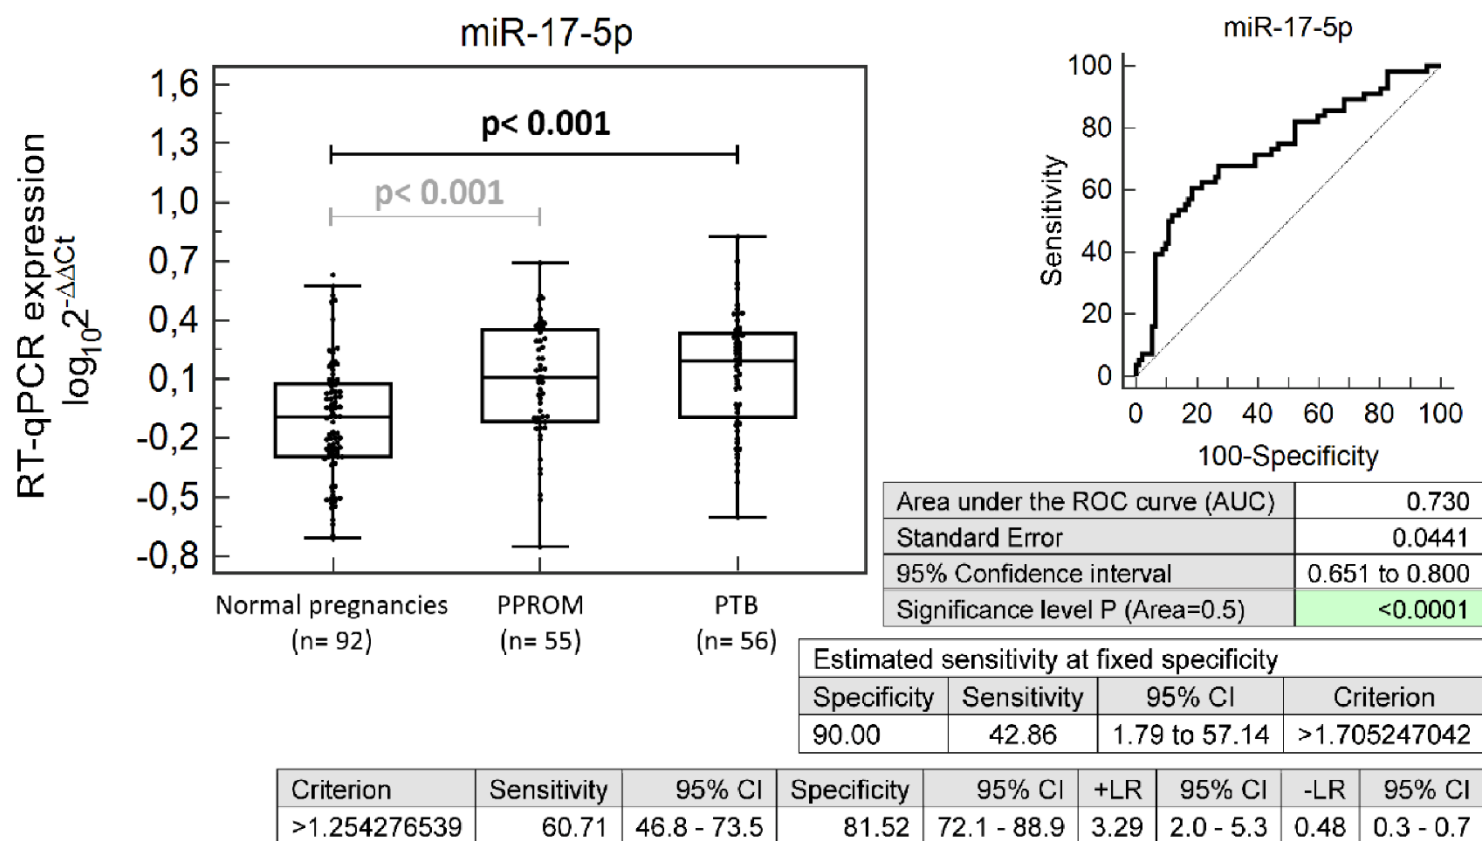

D

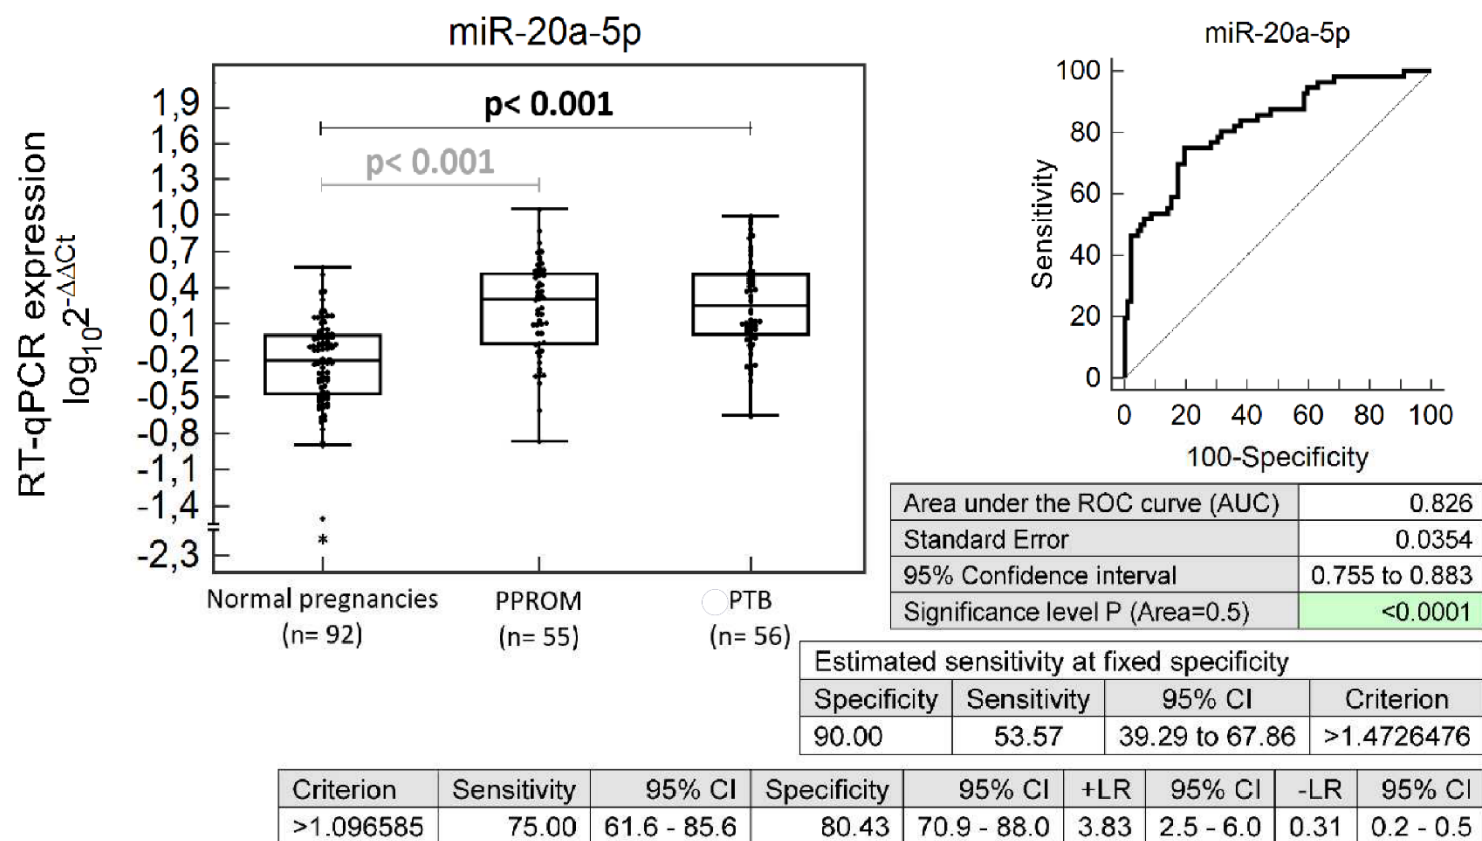

**E**

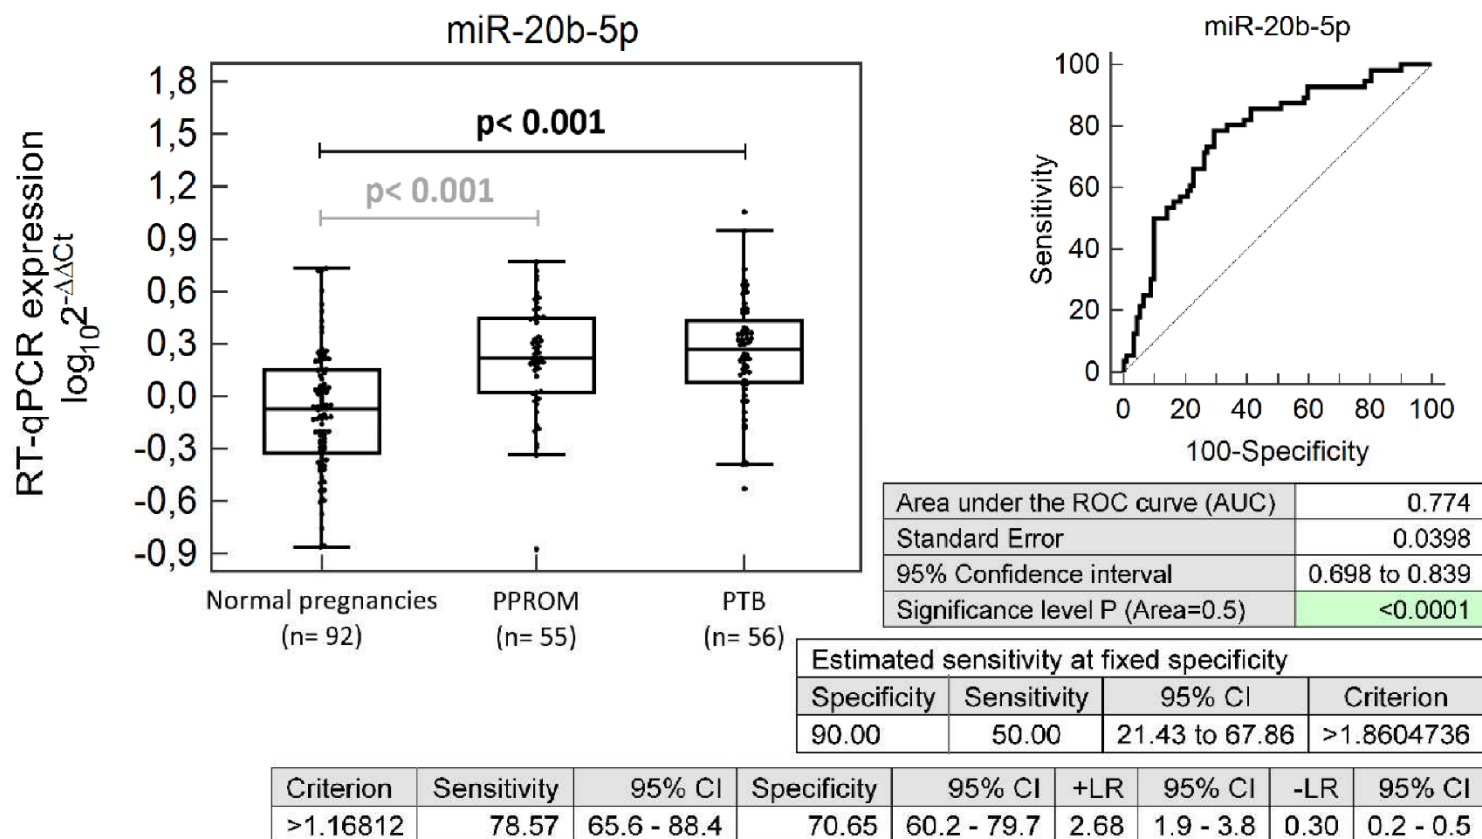

**F**

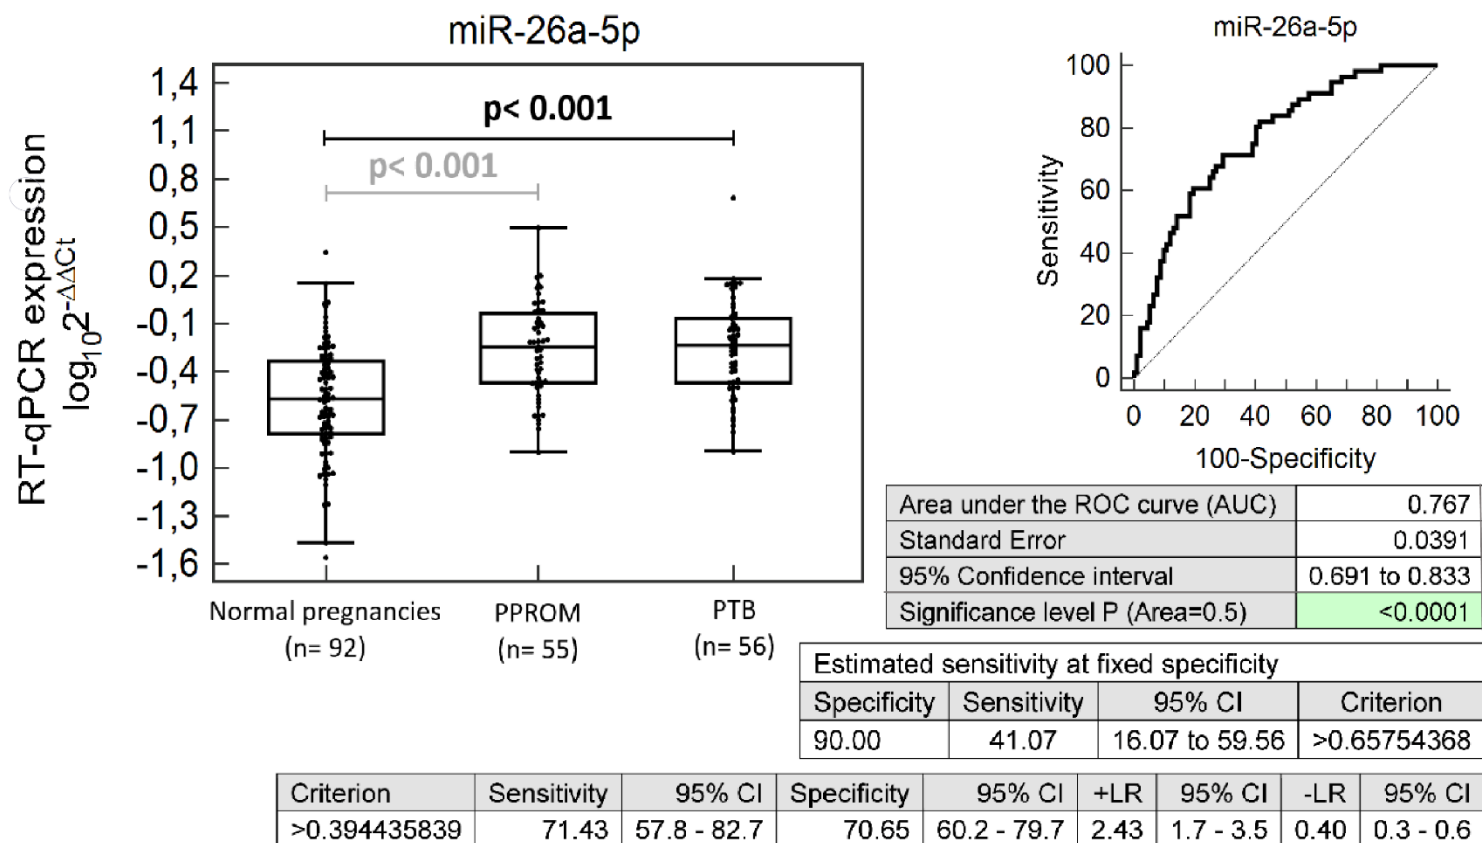

G

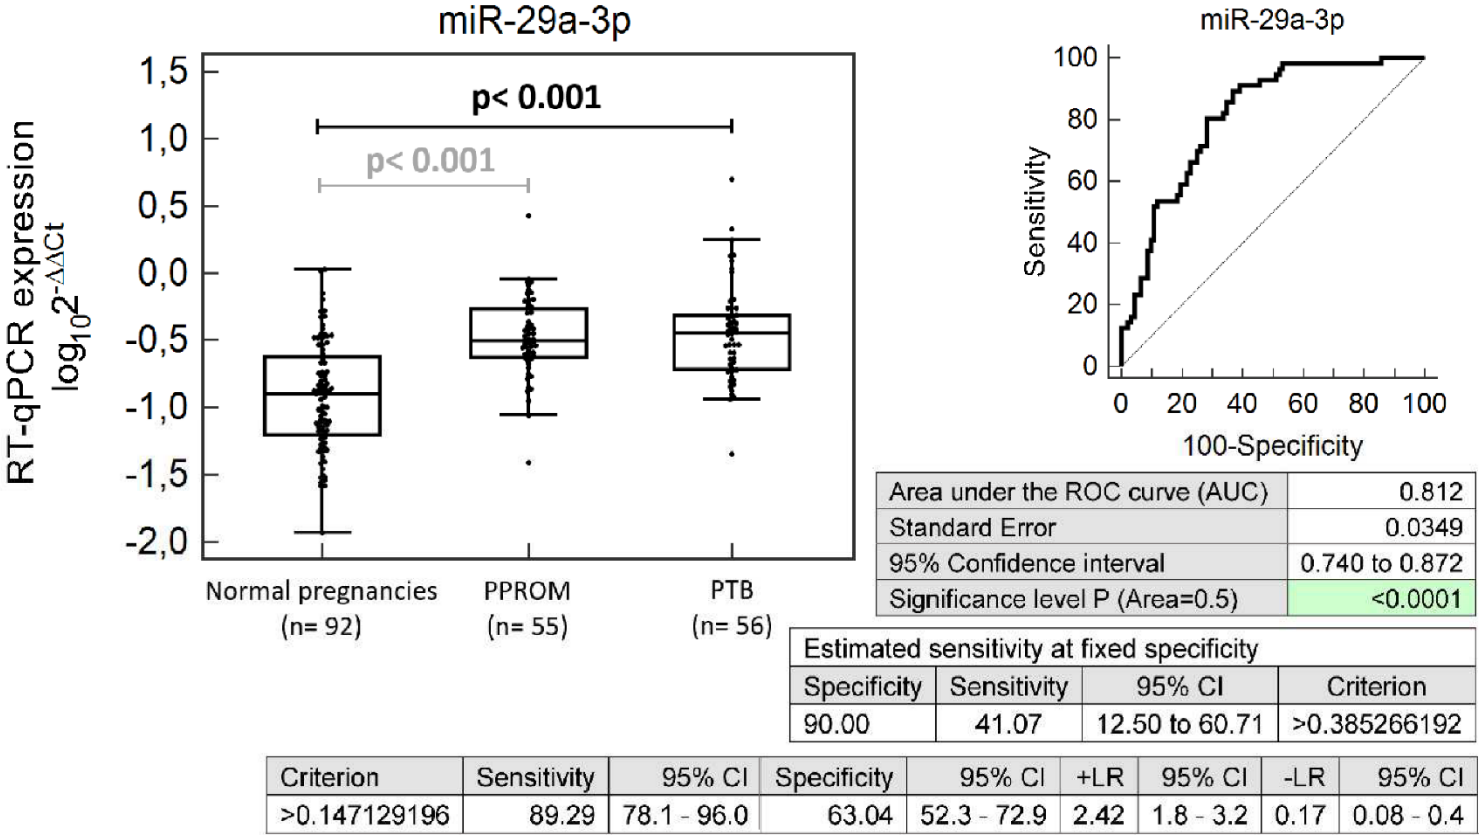

H

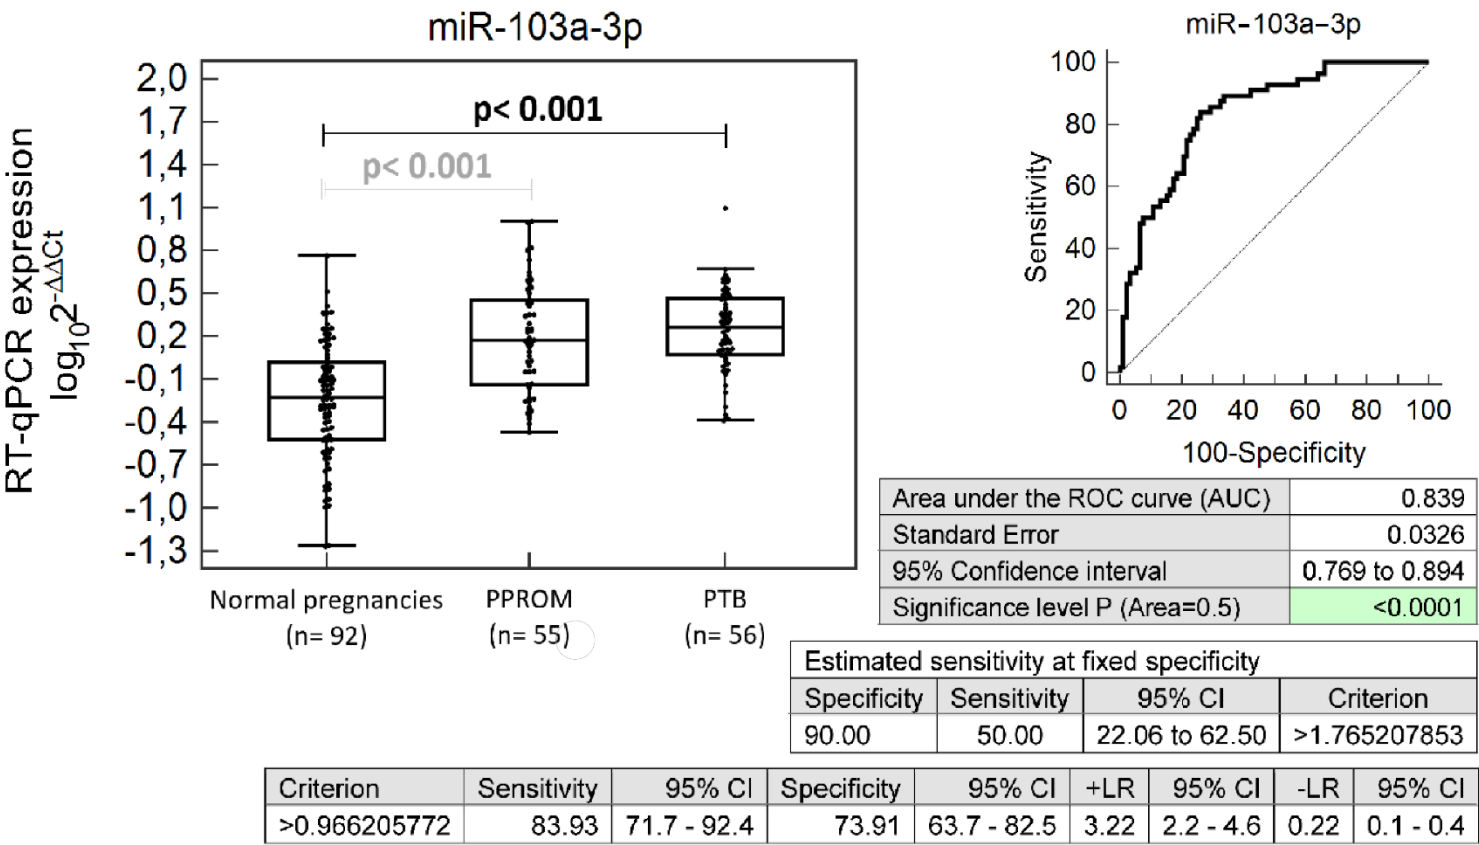

I

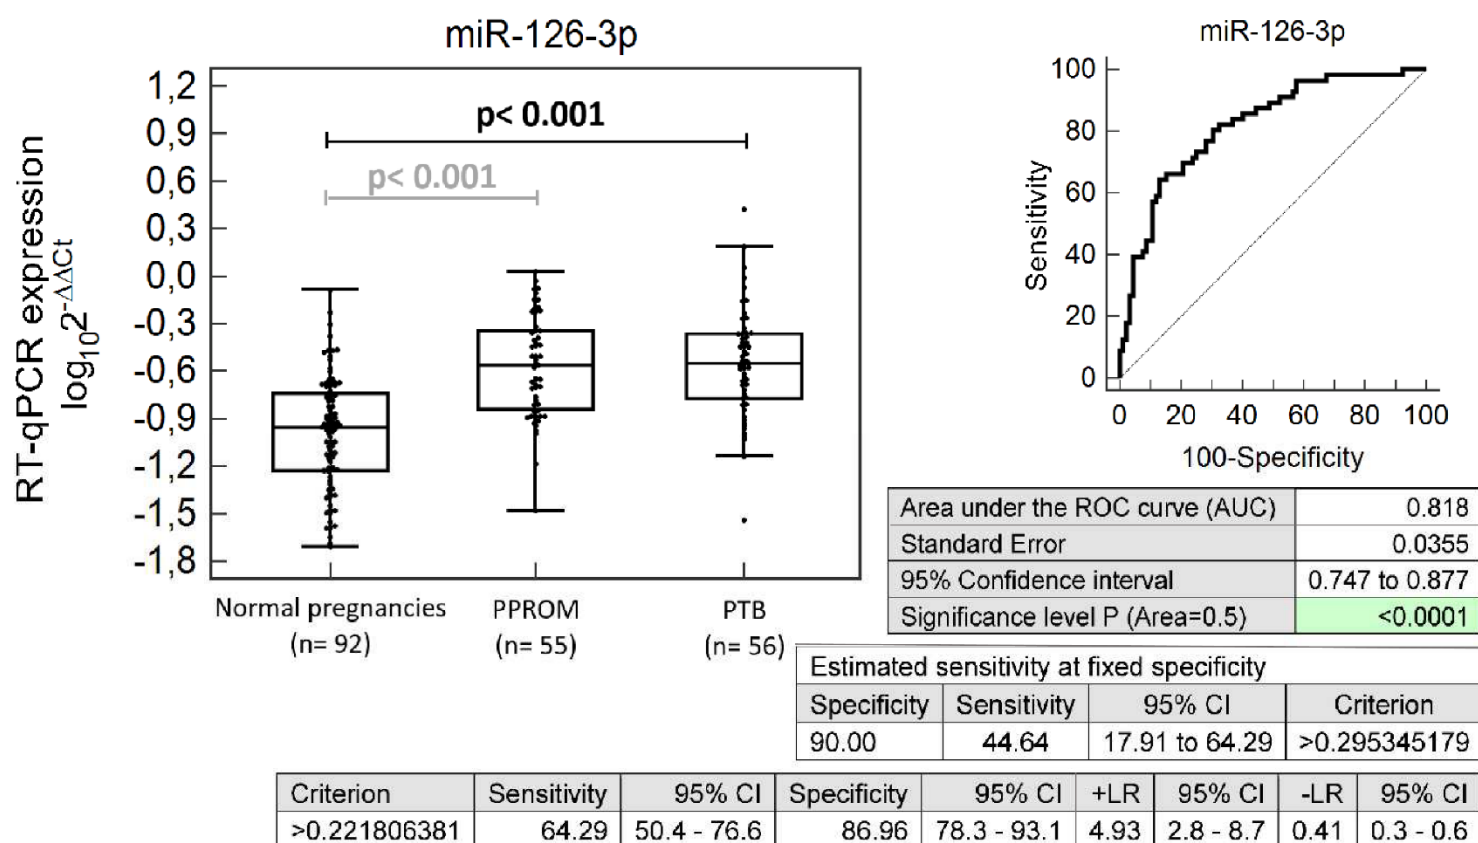

J

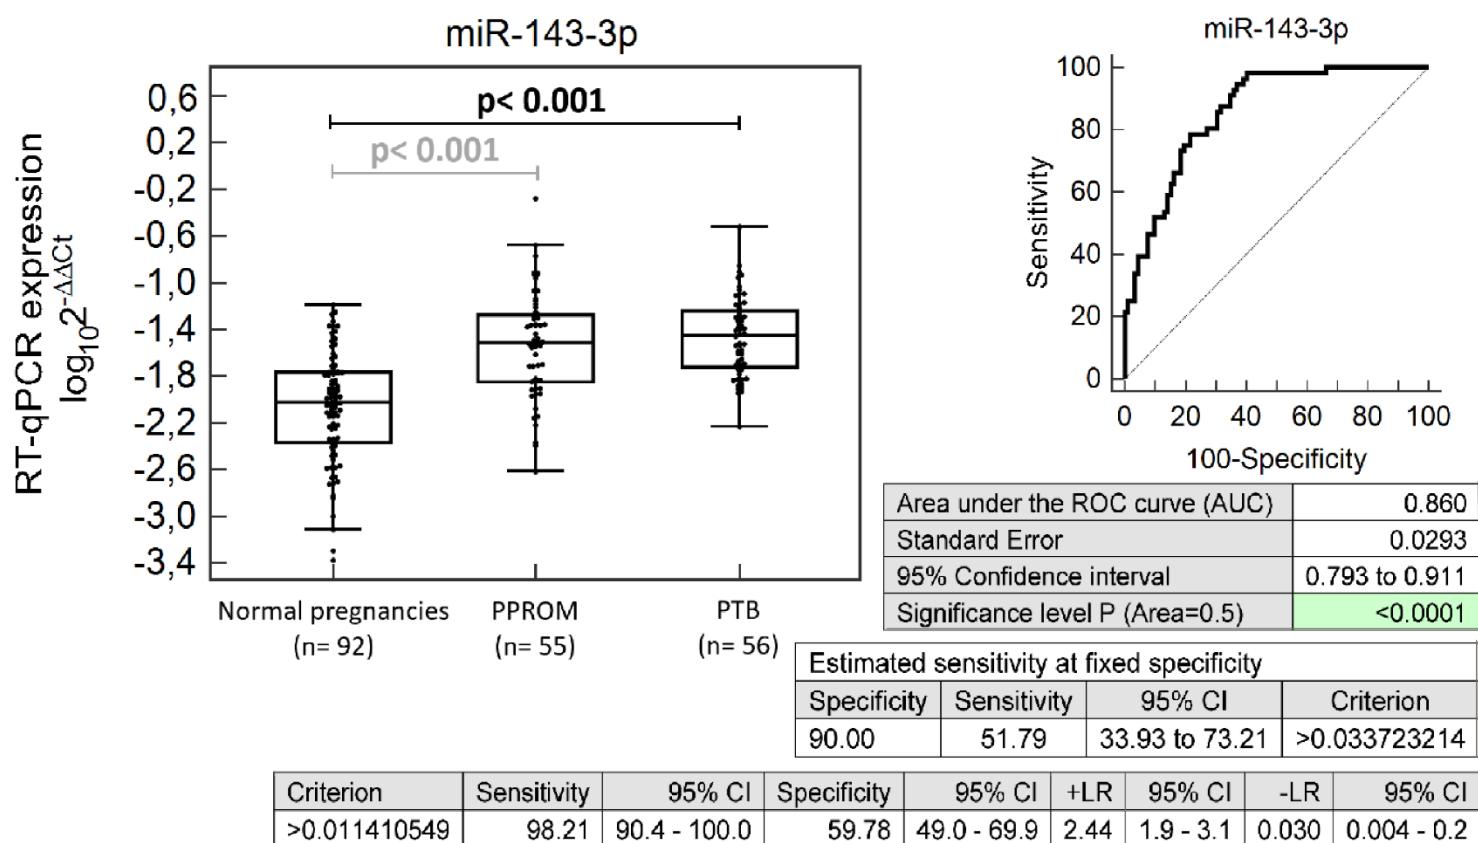



K

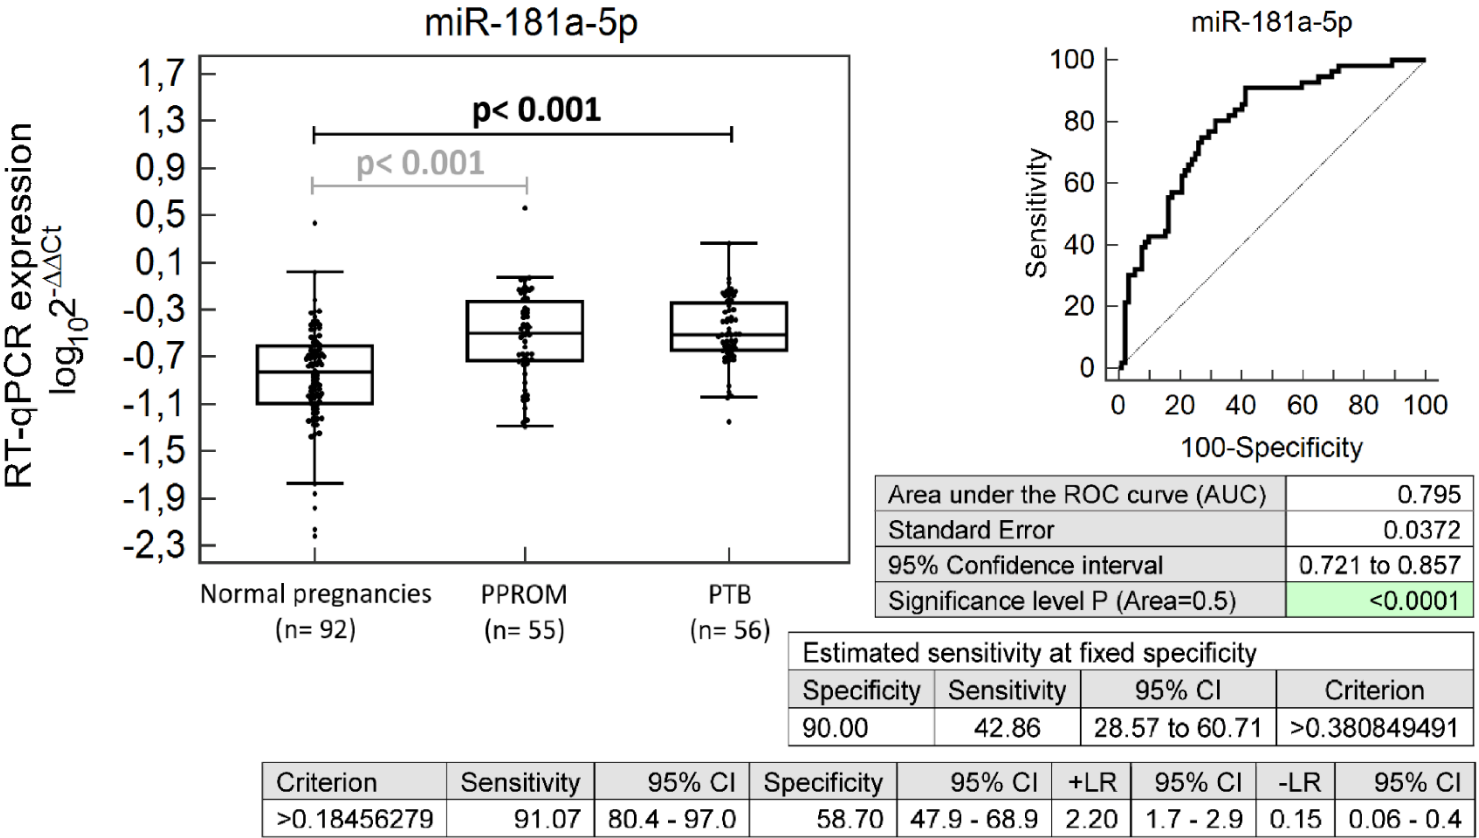

L

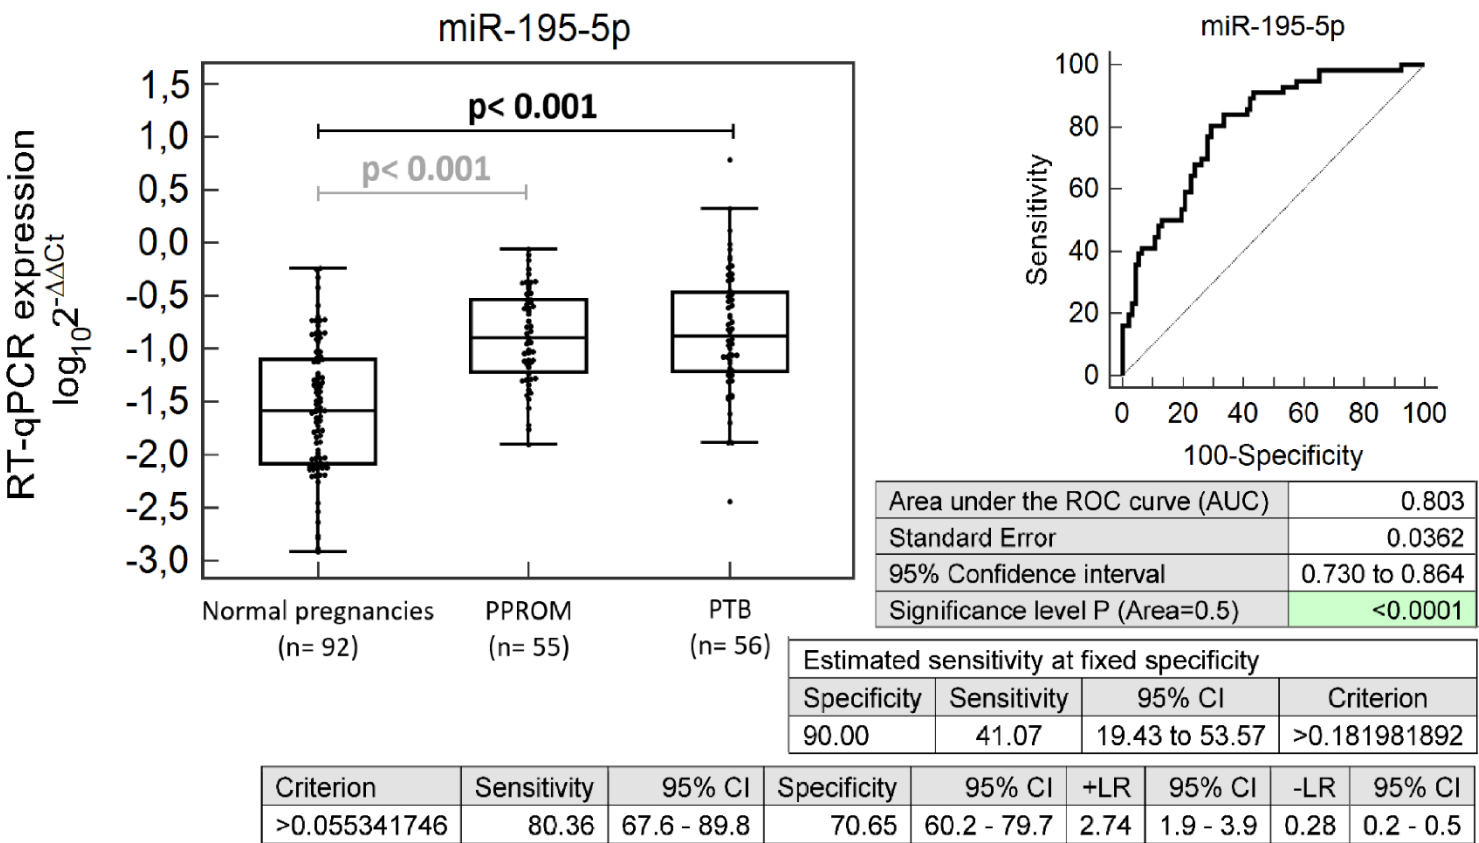

M

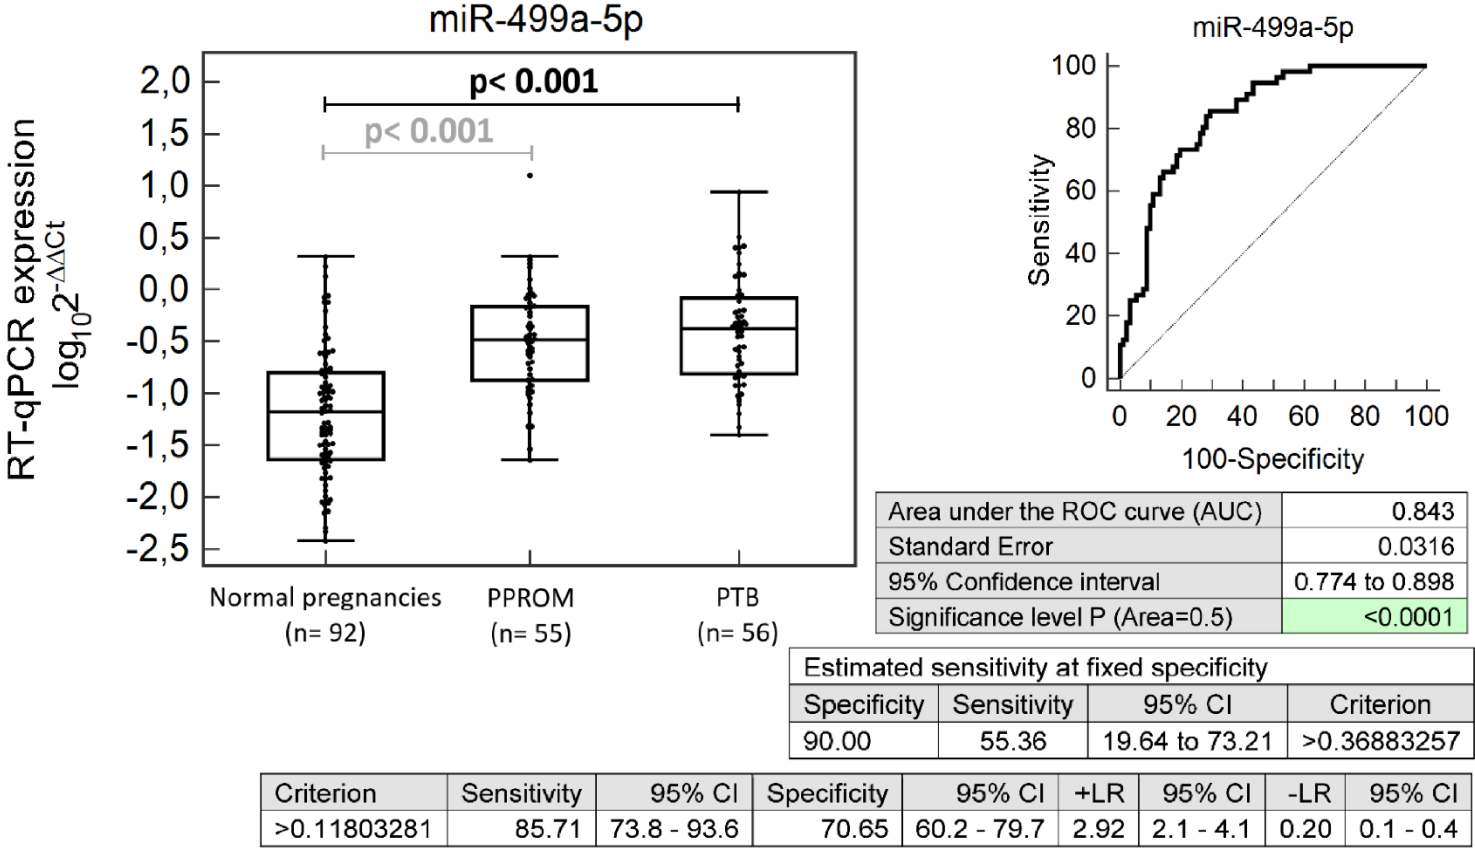

**Supplementary Figure S2.** Altered Postnatal MicroRNA Expression Profile in Children Descending from PTB Pregnancies. Box plots and ROC curves of 13 selected individual microRNAs (miR-1-3p, miR-16-5p, miR-17-5p, miR-20a-5p, miR-20b-5p, miR-26a-5p, miR-29a-3p, miR-103a-3p, miR-126-3p, miR-143-3p, miR-181a-5p, miR-195-5p, and miR-499a-5p) with the best sensitivity at 10.0% FPR are presented.
