# Supplementary material for: Postnatal Expression Profile of MicroRNAs Associated with Cardiovascular Diseases in 3- to 11-Year-Old Preterm-Born Children
Source: MDPI journal article supplement (doi:10.3390/biomedicines9070727), 2021-06-24
Supplement: s1 [file s1]

Supplementary Figure S4.

**A**

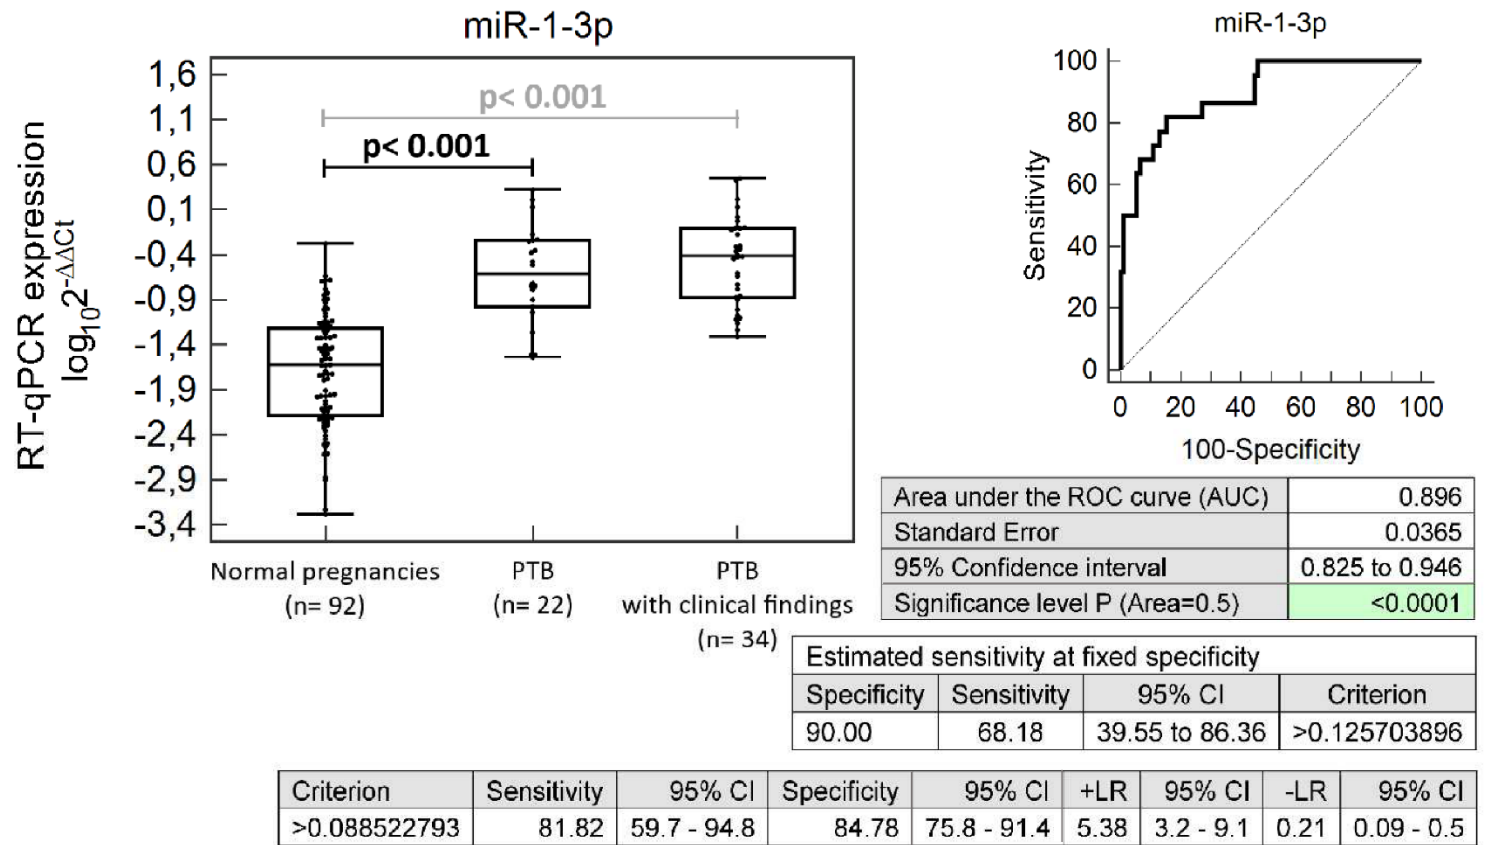

**B**

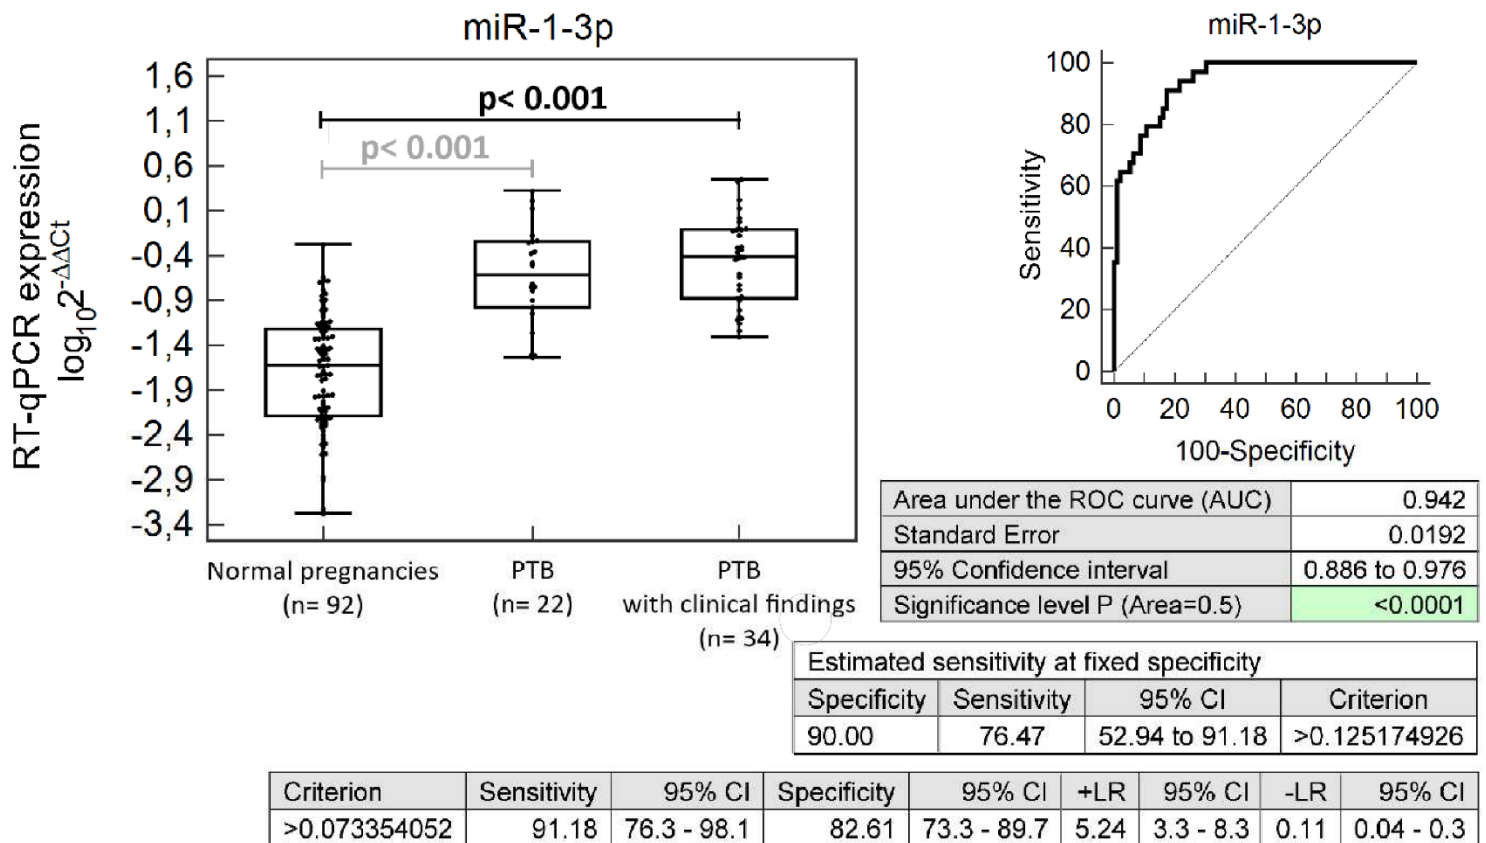

C

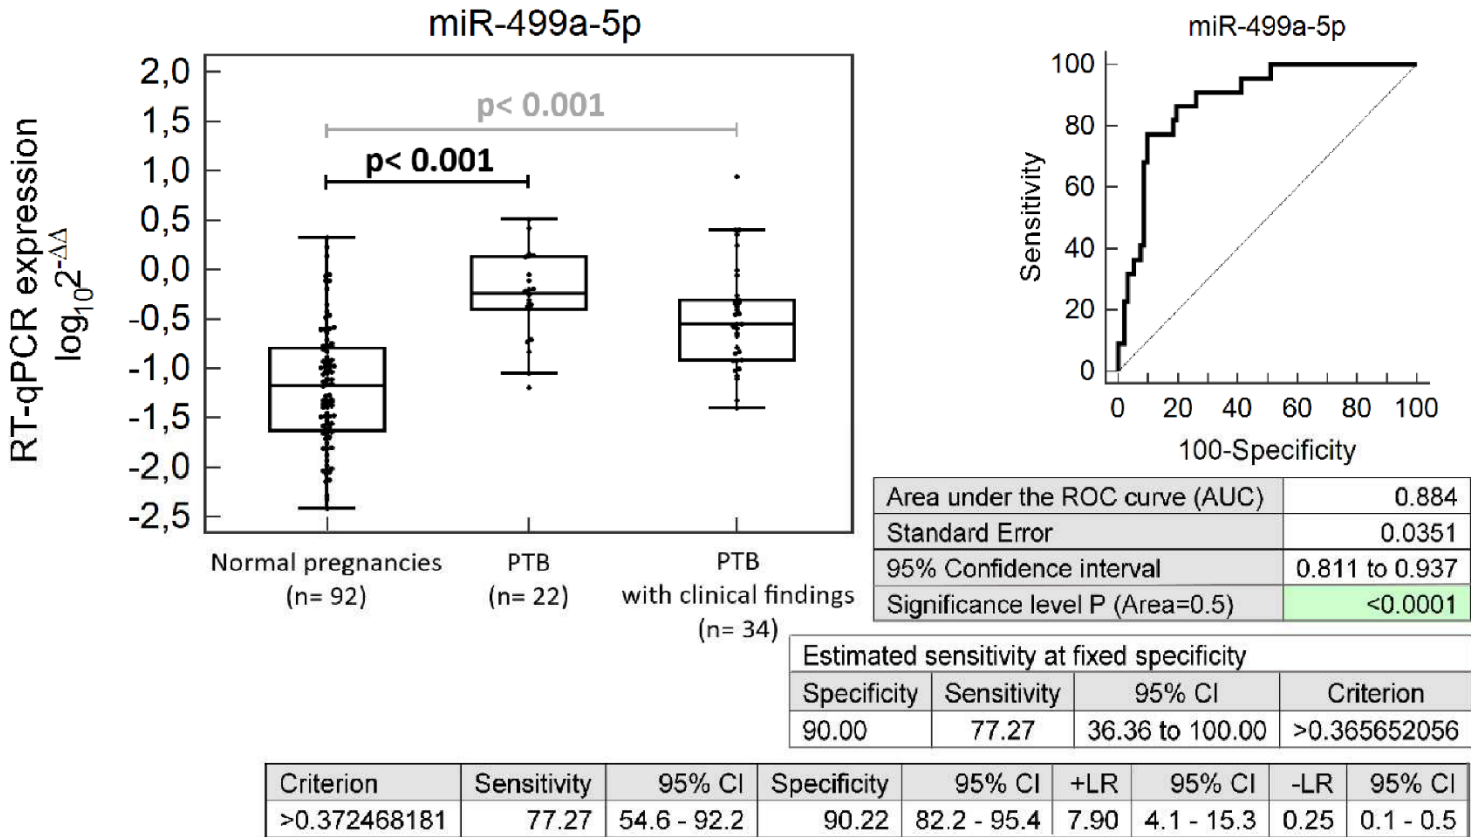

D

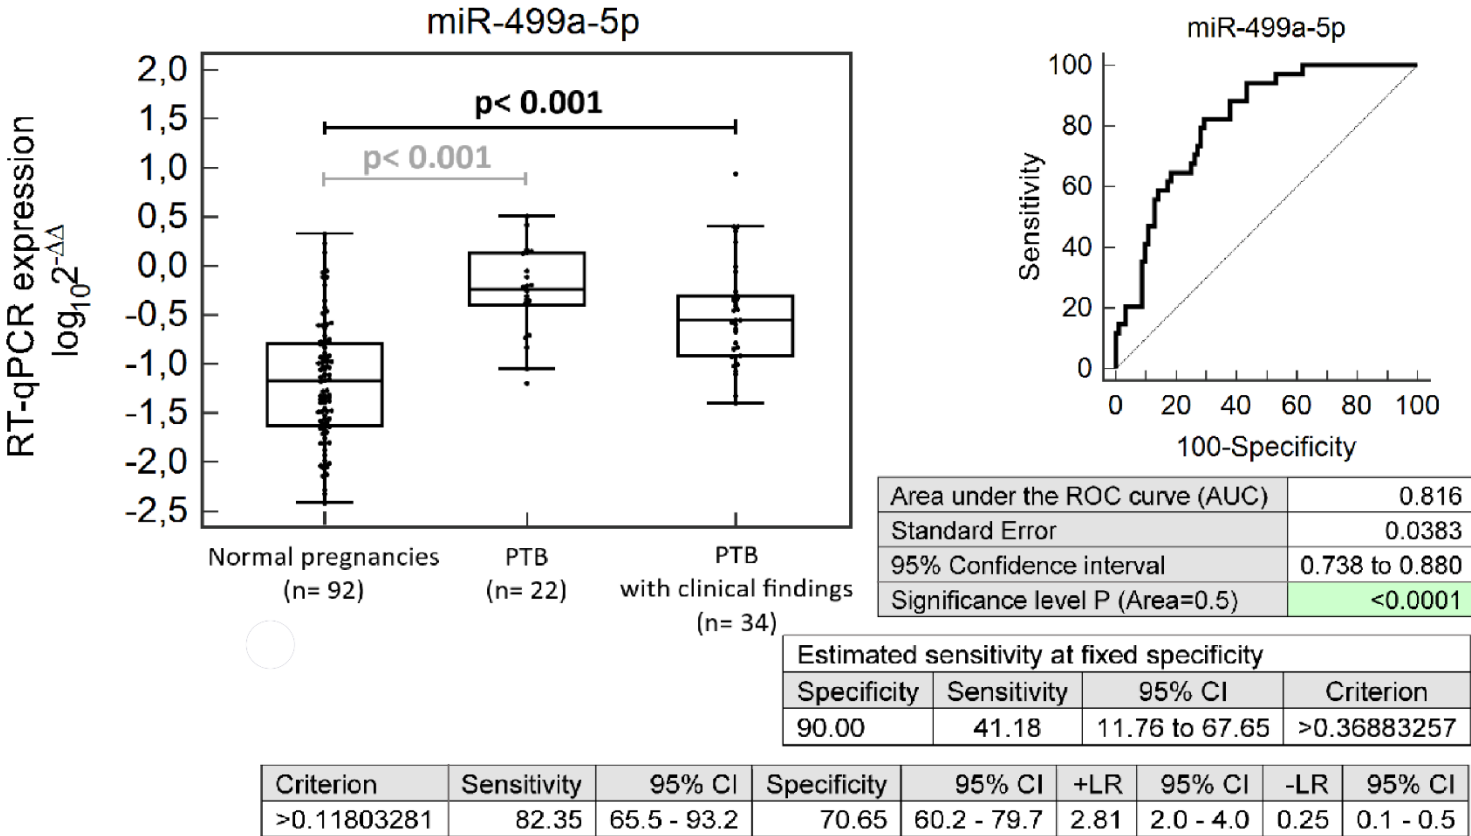

**Supplementary Figure S4.** Altered Postnatal MicroRNA Expression Profile in Preterm Born Children (PTB) with regard to the Absence or Presence of Abnormal Clinical Findings (Overweight/Obesity, Prehypertension/Hypertension, Valve Problems and Heart Defects). Box plots and ROC curves of 2 selected individual microRNAs (miR-1-3p and miR-499a-5p) with the best sensitivity at 10.0% FPR are presented.
