# Supplementary material for: Postnatal Expression Profile of MicroRNAs Associated with Cardiovascular Diseases in 3- to 11-Year-Old Preterm-Born Children
Source: MDPI journal article supplement (doi:10.3390/biomedicines9070727), 2021-06-24
Supplement: s1 [file s1]

Supplementary Figure S1.

**A**

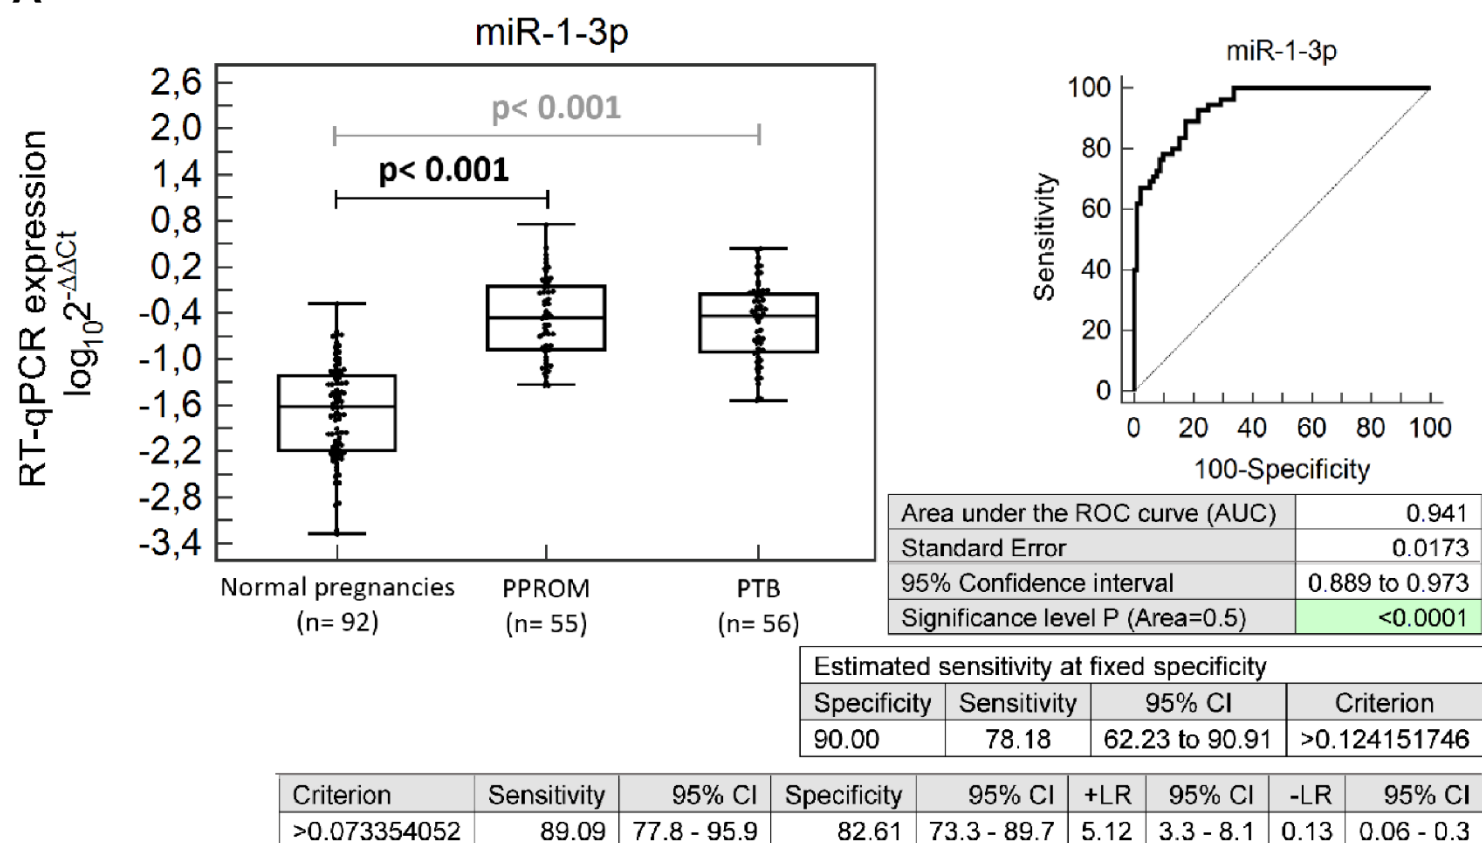

**B**

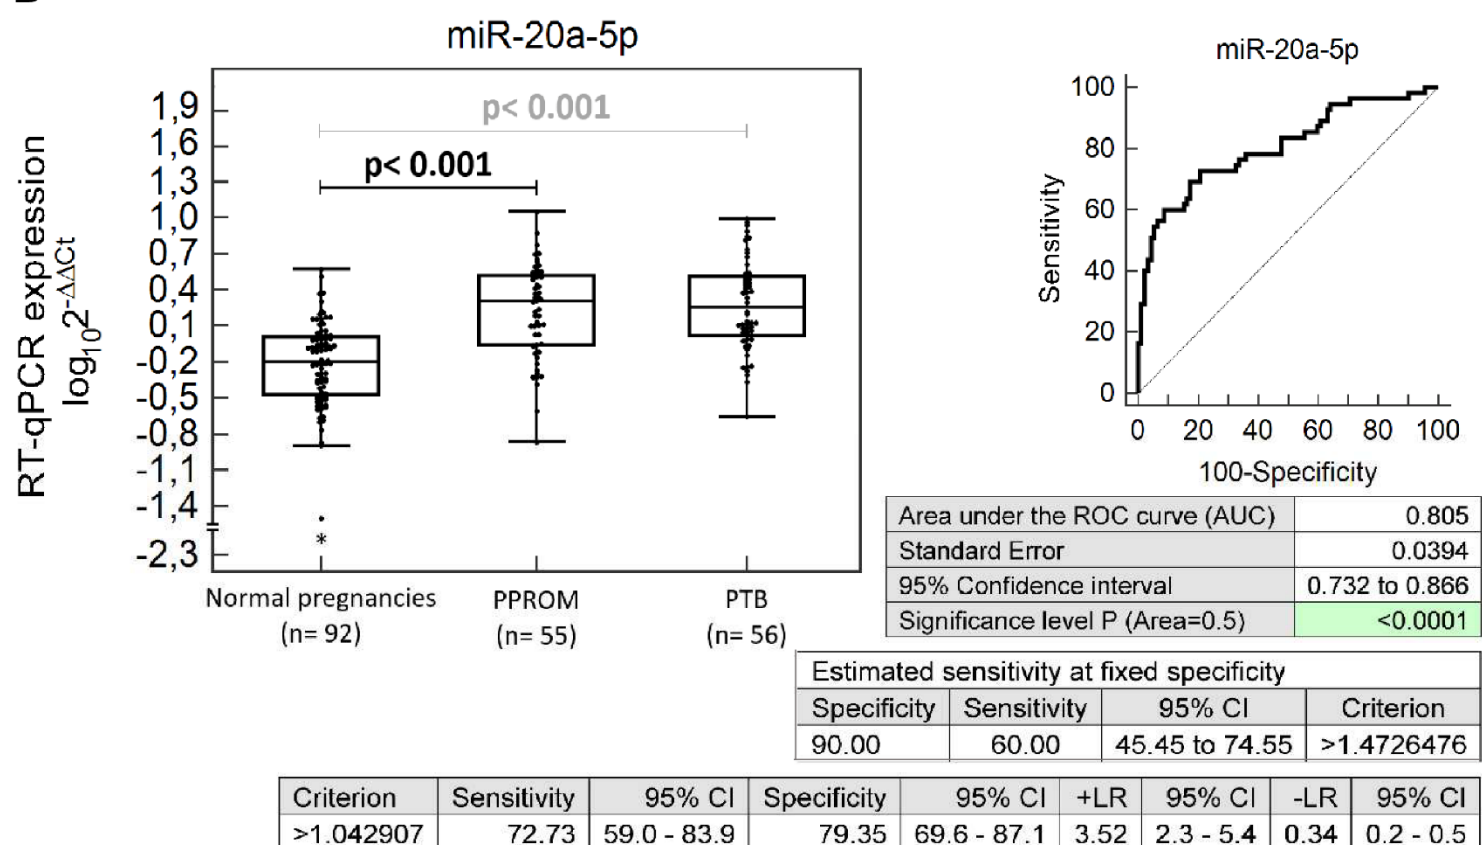

C

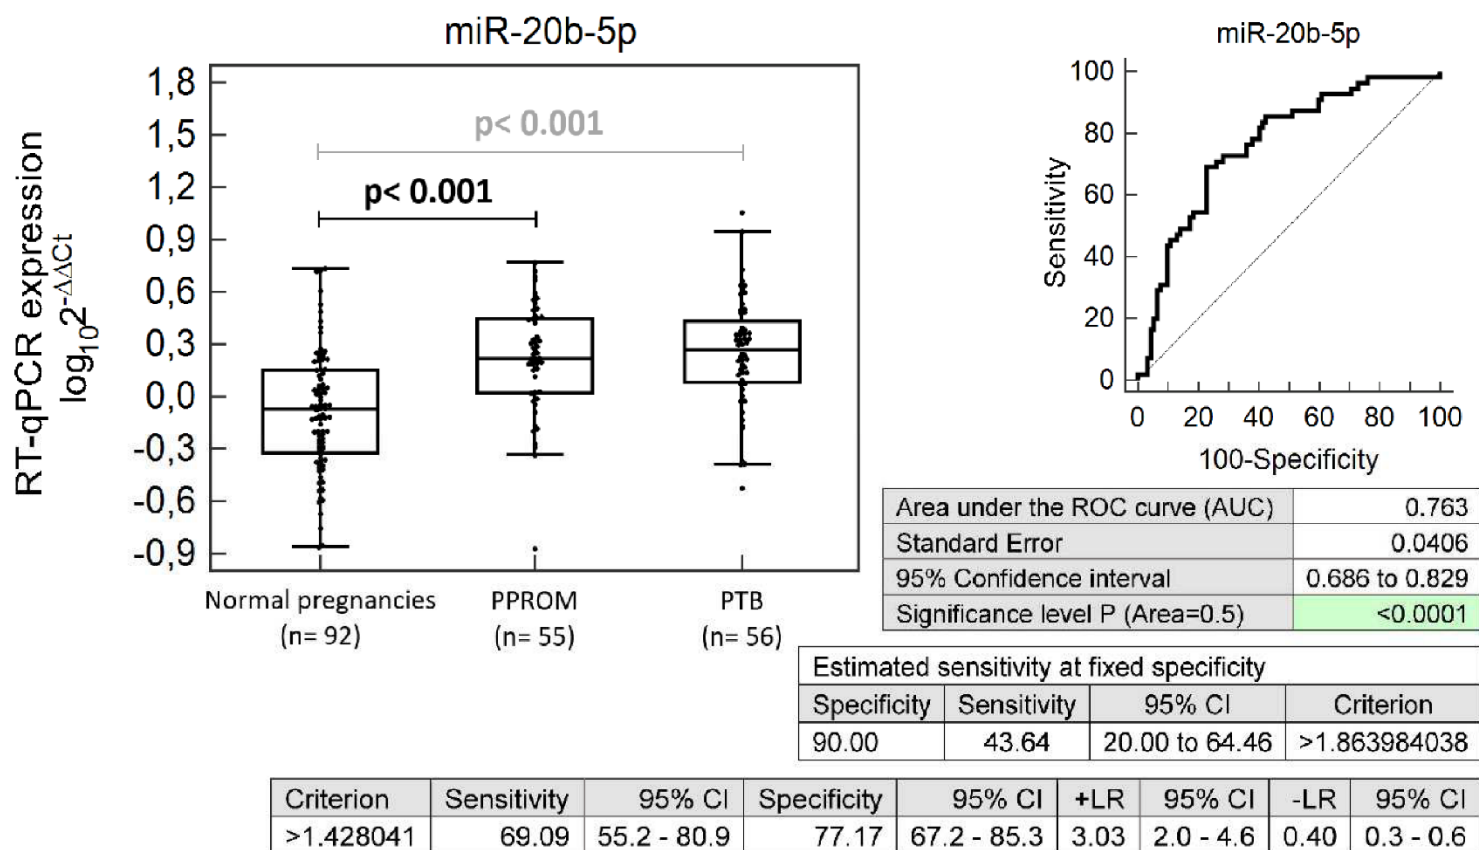

D

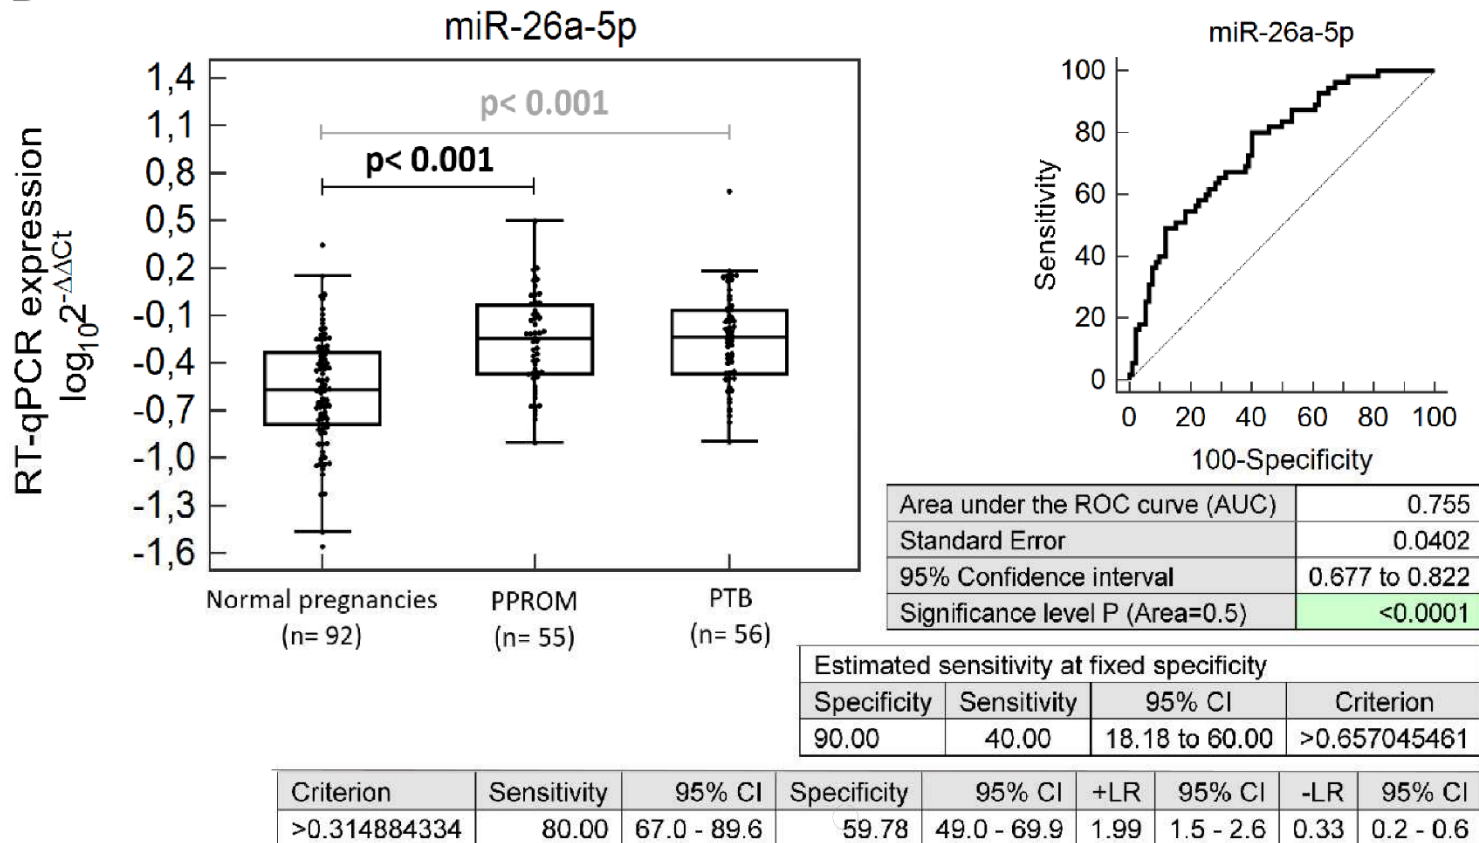

**F**

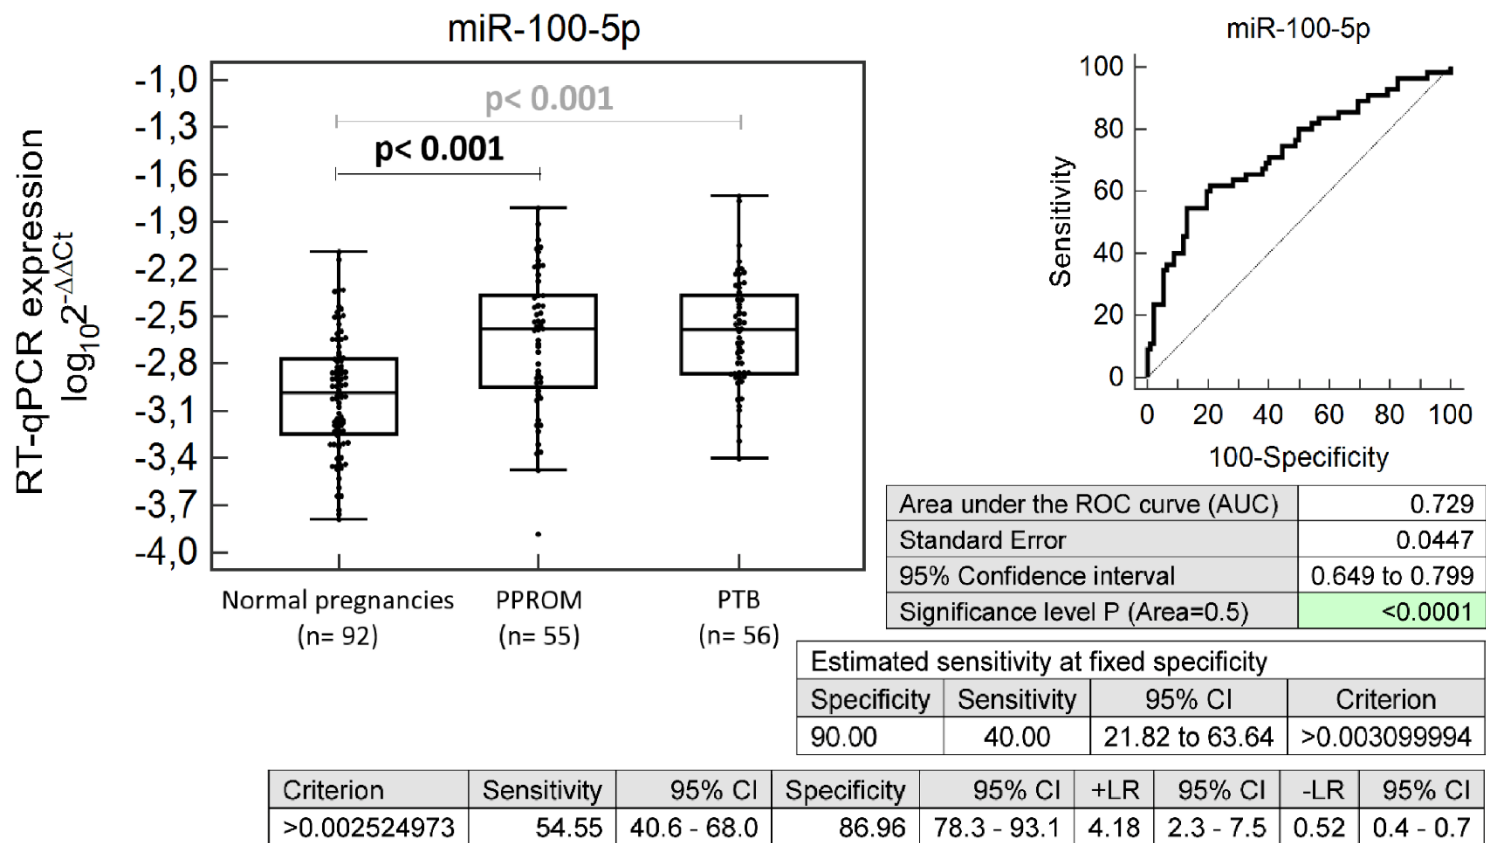

**F**

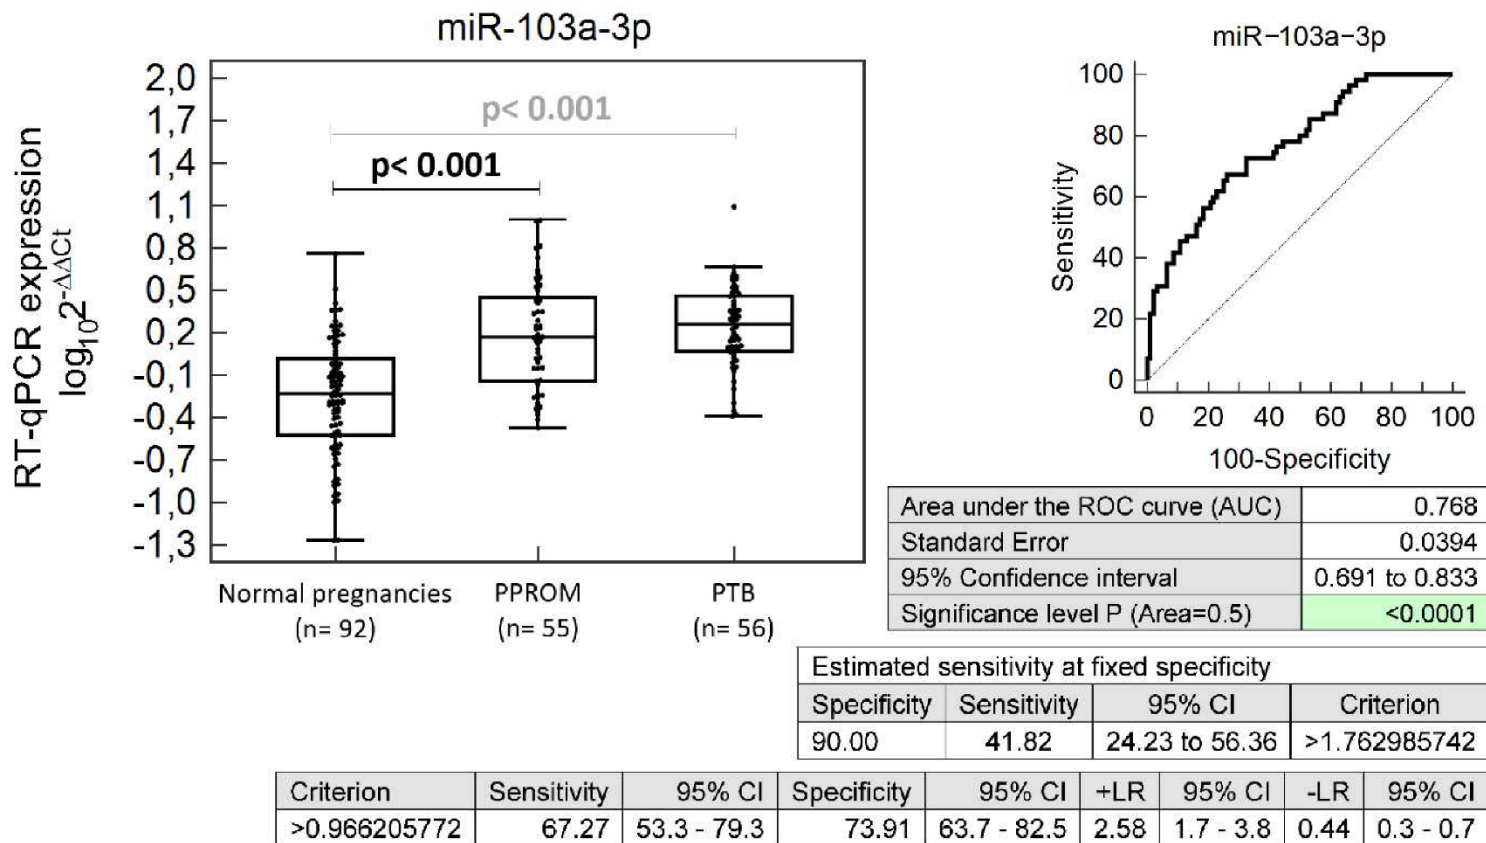

**G**

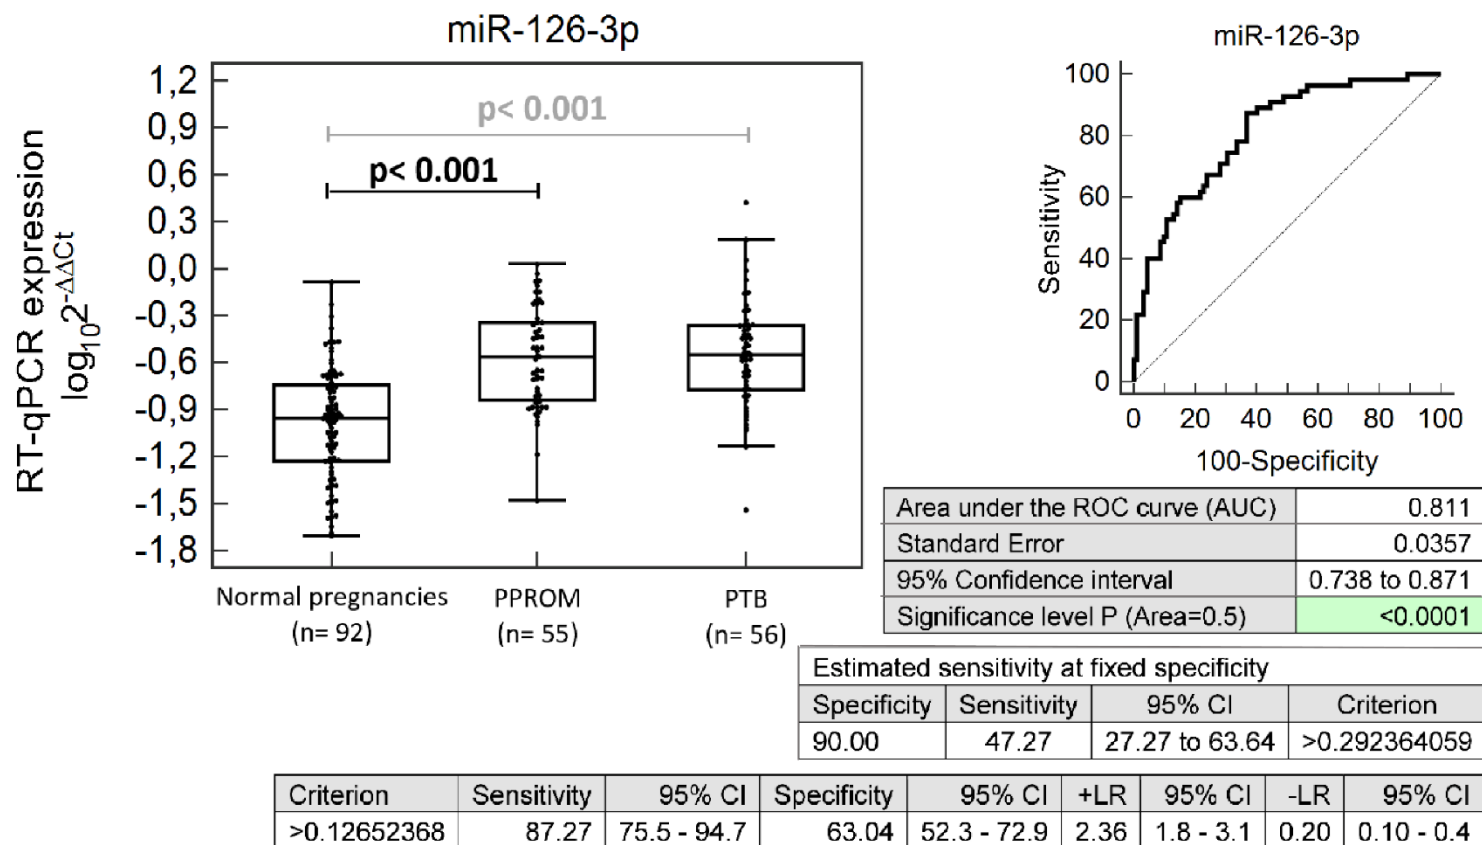

**H**

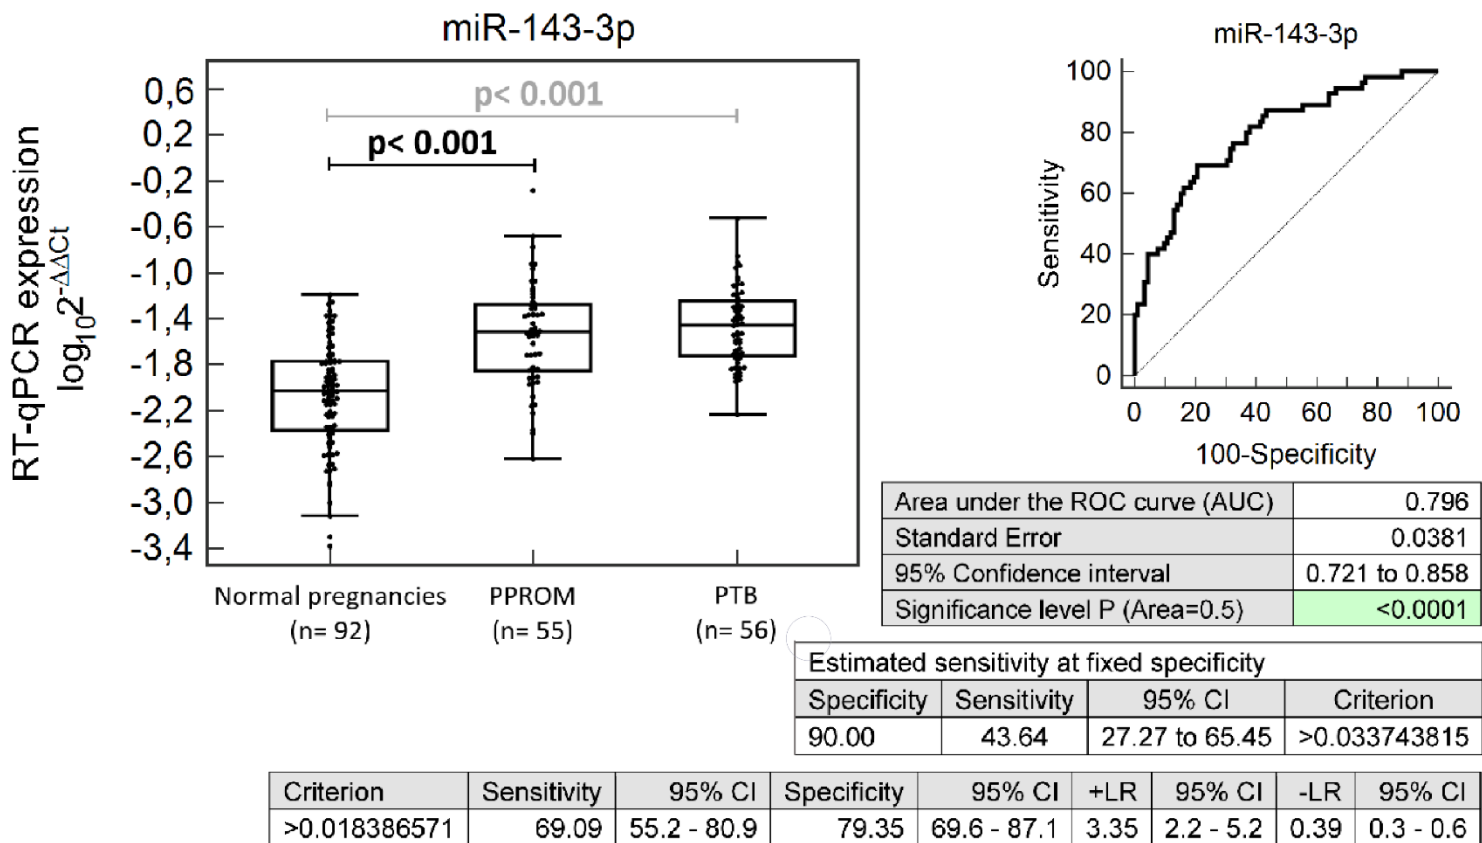

I

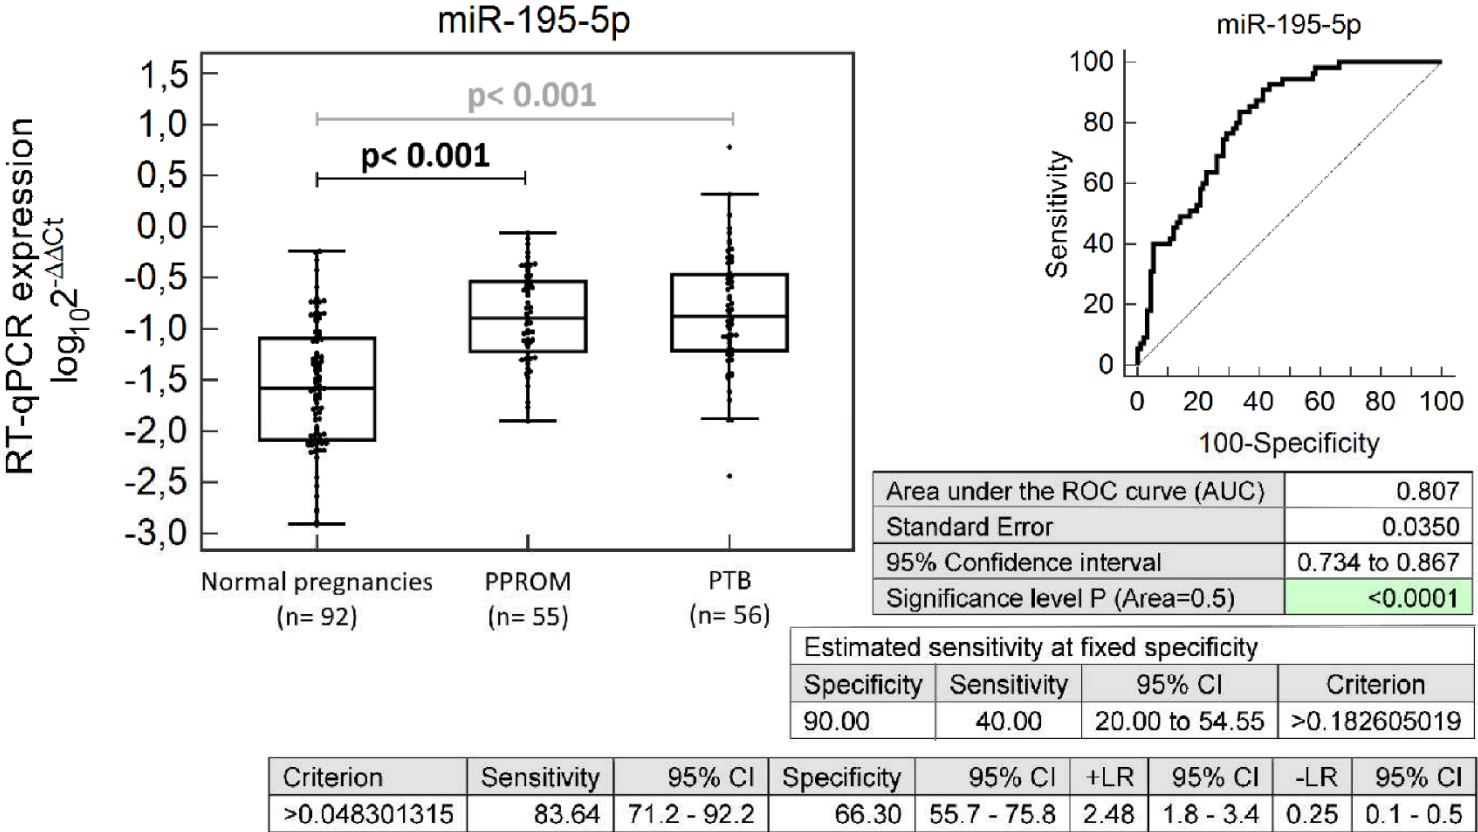

J

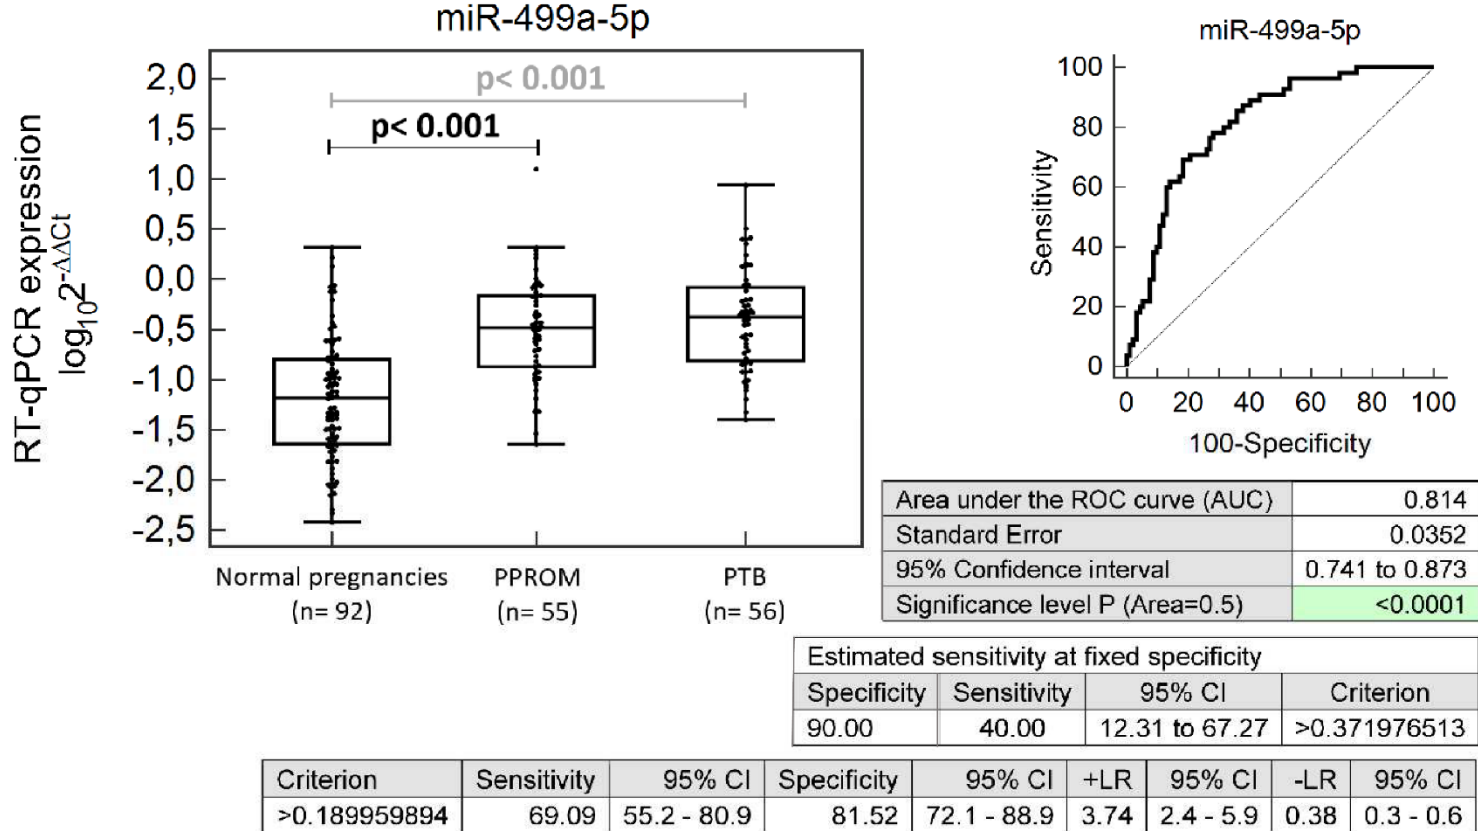

**Supplementary Figure S1.** Altered Postnatal MicroRNA Expression Profile in Children Descending from PPRM Pregnancies. Box plots and ROC curves of 10 selected individual microRNAs (miR-1-3p, miR-20a-5p, miR-20b-5p, miR-26a-5p, miR-100-5p, miR-103a-3p, miR-126-3p, miR-143-3p, miR-195-5p, and miR-499a-5p) with the best sensitivity at 10.0% FPR are presented.
